# Supplementary material
Source: HighWire-hosted journal article supplement (https://cmajopen-stage.highwire.org/highwire/filestream/81012/field_highwire_adjunct_files/1/open-2016-0058-original-submission.pdf)
Supplement: open-2016-0058-original-submission.pdf [file open-2016-0058-original-submission.pdf]

# **Dipeptidyl peptidase-4 (DPP-4) inhibitors and the risk of heart failure: A systematic review and meta-analysis of randomized trials**

Subodh Verma MD, PhD, Ronald M. Goldenberg MD, Deepak L. Bhatt MD, MPH, Michael E. Farkouh MD,  
MSc, Adrian Quan MPhil, Hwee Teoh PhD, Kim A. Connelly MBBS PhD, Lawrence A. Leiter MD, Jan O.  
Friedrich MD, DPhil

Divisions of Cardiac Surgery (Verma, Quan, Teoh), Endocrinology & Metabolism (Teoh, Leiter) and Cardiology  
(Connelly), and Departments of Surgery (Verma), Medicine (Connelly, Leiter, Friedrich) and Critical Care (Friedrich),  
Li Ka Shing Knowledge Institute of St. Michael's Hospital; Departments of Surgery (Verma), Medicine (Farkouh,  
Connelly, Leiter, Friedrich), Nutritional Sciences (Leiter) and Interdepartmental Division of Critical Care (Friedrich),  
University of Toronto, Toronto, ON, Canada; LMC Diabetes & Endocrinology (Goldenberg), Thornhill, ON, Canada;  
Brigham and Women's Hospital Heart & Vascular Center and Harvard Medical School (Bhatt), Boston, MA, U.S.A.;  
Peter Munk Cardiac Centre (Farkouh), University Health Network

Correspondence to Dr. Jan O. Friedrich, Department of Critical Care, St. Michael's Hospital, Suite 4-015,  
Bond Wing, 30 Bond Street, Toronto, ON, M5B 1W8, Canada. Tel: +1-416-864-5559; Fax: +1-416-864-  
6013; E-mail: FriedrichJ@smh.ca or Dr. Subodh Verma, Division of Cardiac Surgery, St. Michael's  
Hospital, Suite 8-003, Bond Wing, 30 Bond Street, Toronto, ON, M5B 1W8, Canada. Tel: +1-416-864-  
5997; Fax: +1-416-864-5881; E-mail: vermasu@smh.ca

1  
2  
3  
4  
5  
6  
7  
8  
9  
10  
11  
12  
13  
14  
15  
16  
17  
18  
19  
20  
21  
22  
23  
24  
25  
26  
27  
28  
29  
30  
31  
32  
33  
34  
35  
36  
37  
38  
39  
40  
41  
42  
43  
44  
45  
46  
47  
48  
49  
50  
51  
52  
53  
54  
55  
56  
57  
58  
59  
60

Authors' email addresses:

|                      |                            |
|----------------------|----------------------------|
| Subodh Verma         | vermasu@smh.ca             |
| Ronald M. Goldenberg | ronaldgoldenberg@gmail.com |
| Deepak L. Bhatt      | DBHATT@BWH.HARVARD.EDU     |
| Michael E. Farkouh   | Michael.Farkouh@uhn.ca     |
| Adrian Quan          | quana@smh.ca               |
| Hwee Teoh            | teohh@smh.ca               |
| Kim A. Connelly      | connellyk@smh.ca           |
| Lawrence A. Leiter   | leiterl@smh.ca             |
| Jan O. Friedrich     | friedrichj@smh.ca          |

## Abstract

**Background:** Given recent discrepant results from randomized trials (RCTs), we examined the totality of RCT evidence assessing DPP-4 inhibitors' association with heart failure (HF).

**Methods:** MEDLINE, EMBASE and ClinicalTrials.gov were searched to August 2016 for RCTs comparing DPP-4 inhibitors to placebo/no therapy for  $\geq 24$  weeks. Pooled analyses used random-effects.

**Results:** We identified 100 RCTs ( $n=79,867$ ) - 3 large cardiovascular-safety RCTs (SAVOR-TIMI 53[saxagliptin]/ $n=16,492$ , EXAMINE[alogliptin]/ $n=5,380$ , and TECOS[sitagliptin]/ $n=14,735$ ), and 97 smaller RCTs with primary outcome that was usually change in A1C. Virtually all were high-quality multi-center placebo-controlled trials. 1192/1244(96%) of HF events were pre-specified, blindly adjudicated, and required hospitalization. Pooled results suggested a 13% HF increase (RR 1.13, 95%CI 1.01–1.26,  $P=0.03$ ,  $I^2=0\%$ ; 32 RCTs,  $n=54,640$ , 1,244 events). When including only the 3 large RCTs, the increase was similar but not statistically significant (RR 1.14, 95%CI 0.97–1.32,  $P=0.10$ ; 3 RCTs,  $n=36,543$ , 1,169 adjudicated events, number needed to harm 246) due to heterogeneity ( $I^2=42\%$ ) leading to wider confidence intervals since SAVOR-TIMI 53 showed increased HF (RR 1.26, 95%CI 1.06–1.49,  $P=0.009$ ) and TECOS no effect (RR 1.00, 95%CI 0.83–1.19,  $P=0.97$ ). Paired differences between agents did not achieve statistical significance (e.g., interaction  $P=0.07$ – $0.13$  for saxagliptin vs. sitagliptin). Results from the two ongoing DPP-4 inhibitor vs. placebo cardiovascular-safety RCTs (CARMELINA [linagliptin]/ $n=8,300$ , MK-3102-018 [omarigliptin]/ $n=4,000$ ) could result in different pooled risk estimates for HF among the cardiovascular-safety RCTs.

**Interpretation:** Despite pooled data from 79,867 patients, whether DPP-4 inhibitors increase HF overall, or exhibit within-class differences, remains unresolved highlighting the importance of ongoing trials which will address the overall but not class difference question.

1  
2  
3  
4  
5  
6  
7  
8  
9  
10  
11  
12  
13  
14  
15  
16  
17  
18  
19  
20  
21  
22  
23  
24  
25  
26  
27  
28  
29  
30  
31  
32  
33  
34  
35  
36  
37  
38  
39  
40  
41  
42  
43  
44  
45  
46  
47  
48  
49  
50  
51  
52  
53  
54  
55  
56  
57  
58  
59  
60

**Abbreviations**

|                   |                                                                                                                                                   |
|-------------------|---------------------------------------------------------------------------------------------------------------------------------------------------|
| CI                | confidence intervals                                                                                                                              |
| DPP-4             | dipeptidyl peptidase-4                                                                                                                            |
| eGFR              | estimated glomerular filtration rate                                                                                                              |
| EMPA-REG OUTCOMES | Empagliflozin, Cardiovascular Outcomes, and Mortality in Type 2 Diabetes                                                                          |
| EXAMINE           | Examination of Cardiovascular Outcomes with Alogliptin versus Standard of Care                                                                    |
| FDA               | Food and Drug Administration                                                                                                                      |
| HF                | heart failure                                                                                                                                     |
| MACE              | major adverse cardiovascular events                                                                                                               |
| NNH               | number needed to harm                                                                                                                             |
| RCTs              | randomized trials                                                                                                                                 |
| RR                | relative risks                                                                                                                                    |
| SAVOR-TIMI 53     | Saxagliptin Assessment of Vascular Outcomes Recorded in Patients with Diabetes Mellitus (SAVOR) – Thrombolysis in Myocardial Infarction (TIMI) 53 |
| SGLT2             | sodium–glucose cotransporter 2                                                                                                                    |
| TECOS             | Trial to Evaluate Cardiovascular Outcomes after Treatment with Sitagliptin                                                                        |

## Introduction

Dipeptidyl peptidase-4 (DPP-4) inhibitors are integral in the management of patients with diabetes given their effective glucose lowering with low risk for hypoglycemia or weight gain.<sup>1</sup> Since heart failure (HF) remains a common complication of diabetes, and is associated with poor long-term prognosis,<sup>2,3</sup> understanding the potential effects of antihyperglycemic agents on risk for HF is of critical and immediate importance. The first large DPP-4 inhibitor vs. placebo randomized trial (RCT). Saxagliptin Assessment of Vascular Outcomes Recorded in Patients with Diabetes Mellitus (SAVOR)—Thrombolysis in Myocardial Infarction (TIMI) 53 (SAVOR-TIMI 53) (n=16,492 patients with a history of, or at risk for cardiovascular events) unexpectedly found a significantly higher rate of heart failure (HF) requiring hospitalization.<sup>4,5</sup> The second was the Examination of Cardiovascular Outcomes with Alogliptin versus Standard of Care (EXAMINE) (n=5,380 patients post-acute coronary syndrome) found a numerical but non-statistically significant higher rate of HF requiring hospitalization.<sup>6,7</sup> In contrast, Trial to Evaluate Cardiovascular Outcomes after Treatment with Sitagliptin (TECOS), enrolled (n=14,735 patients with cardiovascular disease and longer follow up [median 3.0 years vs. 1.5 and 2.1 years for EXAMINE and SAVOR-TIMI 53]) found almost identical rates of hospitalization for HF in the sitagliptin and placebo groups.<sup>8</sup>

The potential safety issue arising from SAVOR-TIMI 53 and EXAMINE led to the FDA's recent recommendation<sup>9</sup> to consider discontinuing saxagliptin and alogliptin in patients that develop HF. Given the apparent discrepant results from TECOS,<sup>3,10,11</sup> we felt it was important to inform clinicians who are concerned about the potential increased HF signal by providing them with the totality of the available randomized controlled trial evidence in the field. In addition, the recent publication of the EMPA-REG OUTCOMES trial<sup>12</sup> showing that HF hospitalization was significantly reduced with the use of an oral antihyperglycemic agent of a different class, empagliflozin, a sodium–glucose cotransporter 2 (SGLT2)

1  
2  
3  
4  
5  
6  
7  
8  
9  
10  
11  
12  
13  
14  
15  
16  
17  
18  
19  
20  
21  
22  
23  
24  
25  
26  
27  
28  
29  
30  
31  
32  
33  
34  
35  
36  
37  
38  
39  
40  
41  
42  
43  
44  
45  
46  
47  
48  
49  
50  
51  
52  
53  
54  
55  
56  
57  
58  
59  
60

inhibitor, has increased the importance of quantifying the risk of increased HF for DPP-4 inhibitors. The two specific questions addressed by this systematic review and meta-analysis are whether 1) DPP-4 inhibitors, as a class, compared to placebo or no therapy increases HF in patients with Type 2 diabetes, and 2) whether there are significant within-class differences.

Confidential

## Methods

### Data Sources and Study Selection

We systematically searched MEDLINE and EMBASE (inception-to August 2016) and ClinicalTrials.gov in duplicate for RCTs comparing treatment of any DPP-4 inhibitor vs. placebo or no therapy (active comparator RCTs were excluded) that enrolled adult patients with type 2 diabetes for at least 24 weeks. For multiple treatment group RCTs we included only randomized groups in which treatments differed by DPP-4 inhibitor treatment. Groups with different DPP-4 inhibitor doses were combined within the same trial. RCTs in which placebo-treated groups were subsequently switched to open-label active therapy were only included if this switch occurred after 24 weeks of therapy.

### Data Extraction and Risk of Bias Assessment

For each RCT, baseline patient characteristics, intervention, outcome definitions and events were collected in duplicate (discrepancies resolved by consensus). Risk of bias (patient, caregiver, and outcome assessor blinding; allocation concealment; intention-to-treat analysis; early stopping for benefit;<sup>13</sup> loss to follow up) were also assessed in duplicate.<sup>14</sup>

### Data Analysis

In the primary analysis we included all heart failure outcomes when listed either as a serious adverse event (SAE) or adverse event, though all were listed as SAEs. As secondary analysis, we included only RCTs in which cardiovascular outcomes were the primary outcome and hospitalization for HF was an adjudicated primary or secondary outcome. Additional data analysis details are provided in the on-line appendix. We did not register or publish a review protocol.

1  
2  
3  
4  
5  
6  
7  
8  
9  
10  
11  
12  
13  
14  
15  
16  
17  
18  
19  
20  
21  
22  
23  
24  
25  
26  
27  
28  
29  
30  
31  
32  
33  
34  
35  
36  
37  
38  
39  
40  
41  
42  
43  
44  
45  
46  
47  
48  
49  
50  
51  
52  
53  
54  
55  
56  
57  
58  
59  
60

**Results**

**Search results**

One hundred twenty-one RCTs were identified in which treatment between randomized groups differed only by DPP-4 inhibitor treatment. Of these, 11 RCTs listed only on ClinicalTrials.gov provided no results (NCT00683735,NCT01356381,NCT01582230,NCT01697592,NCT01704261,NCT01792518,NCT01890122,NCT01990469,NCT02015299,NCT02099110,NCT02104804) and 10 RCT publications did not provide HF data<sup>15-24</sup> leaving 100 RCTs that reported the number of patients with HF (Supplementary Table 1, Figure 1) and these enrolled 79,867 patients into groups that differed only in DPP-4 inhibitor therapy.<sup>4-8,25-136</sup>

**RCT patient characteristics**

Only the three RCTs discussed in the Introduction (SAVOR-TIMI 53, EXAMINE, and TECOS) had cardiovascular outcomes as the primary outcome and enrolled 46% (36,543/79,867) of all patients in the included RCTs (Tables 1 and 2). Enrolled patients in these three RCTs had a mean age of 61–66 years old, two-thirds of whom were men and ~70% were of white race. Median BMI was approximately 30 kg/m<sup>2</sup>. The patients had type 2 diabetes for median durations that ranged from 7–10 years with a mean baseline A1C of 8.0% (SAVOR-TIMI 53, EXAMINE) or 7.2% (TECOS), and with a mean of 23–41% also taking insulin in addition to oral antihyperglycemic agents. A large majority of patients had other cardiovascular risk factors including hypertension and dyslipidemia, and most had a previous myocardial infarction or revascularization, while a minority had a previous stroke (Table 2). Most patients were receiving ASA and/or another anti-platelet therapy as well as a statin, angiotensin converting enzyme inhibitors or angiotensin receptor antagonists, and beta-blockers or other antihypertensive medications. Patients with pre-existing HF ranged from 13–28% among the included larger RCTs.



The primary outcome for the vast majority of the smaller RCTs (n=89/97) was glycemic control. One small trial, presented only in abstract form,<sup>104</sup> enrolled patients with class I–III NYHA HF and measured change in left-ventricular ejection fraction as its primary outcome. Enrolled patients in these smaller trials had variable characteristics (Table 1). Mean age was typically in the mid-50's, with >50% men, and >50% of white race, and median BMI approximately 30 kg/m<sup>2</sup>. The mean duration of type 2 diabetes ranged from 0–17 years with the majority of mean baseline A1C levels between 8.0–8.5%. No patients were using insulin therapy in the vast majority of smaller RCTs. Few data were provided on the prevalence of other cardiovascular risk factors or cardiovascular medication use in the smaller RCTs.

### **Risk of Bias Assessment**

Included RCTs generally had low risk of bias. The three large RCTs and all trials with events were blinded using placebos with concealed allocation, intention-to-treat analysis, no stopping early for benefit and had low numbers (typically <1–5%) of randomized patients with missing HF outcome data (Table 3). Only six of the smaller trials, each with zero events, were not blinded or had unclear allocation concealment,<sup>75,96,120,129,130,135,136</sup> and only four had >5% of randomized patients lost to follow up.<sup>83,116,120,136</sup> The three larger trials as well as the small trial that enrolled patients with class I–III NYHA HF,<sup>104</sup> defined HF requiring hospitalization as a pre-specified secondary outcome that was adjudicated by outcome assessors blinded to treatment allocation. The three larger trials used virtually identical HF definitions (Table 2 footnote). Virtually all RCTs were pharmaceutical company funded.

### **Quantitative Data Synthesis**

Pooling HF data from the three larger RCTs and the 29 smaller RCTs with at least one patient with HF suggested a 13% increased risk of HF with DPP-4 inhibitors which achieved statistical significance (pooled RR 1.13, 95% CI 1.01–1.26, P=0.03; 32 RCTs, 54,640 patients, 1,244 events) with no significant

1  
2  
3  
4  
5  
6  
7  
8  
9  
10  
11  
12  
13  
14  
15  
16  
17  
18  
19  
20  
21  
22  
23  
24  
25  
26  
27  
28  
29  
30  
31  
32  
33  
34  
35  
36  
37  
38  
39  
40  
41  
42  
43  
44  
45  
46  
47  
48  
49  
50  
51  
52  
53  
54  
55  
56  
57  
58  
59  
60

heterogeneity ( $I^2=0\%$ ) (Figure 2). 94% (1169/1244) of the events came from the three larger RCTs, and 23 of the remaining 75 (31%) events reported in the 29 smaller RCTs occurred in the one RCT that enrolled patients with class I–III NYHA HF. Thus, in total 1,192/1,244 (96%) of HF outcomes occurred in RCTs that pre-specified that these i) required hospitalization and ii) were subject to blinded adjudication. Including also the results from the 68 smaller RCTs ( $n=25,227$ ) with no patients with HF and thus RR equal to 1.00 (or no effect), as the pre-planned sensitivity analysis, did not change the pooled result (pooled RR 1.12, 95% CI 1.01–1.25,  $P=0.03$ ,  $I^2=0\%$ ; 100 RCTs, 79,867 patients, 1244 events).

Pooling data from only the three large RCTs with cardiovascular primary outcomes and blinded outcome adjudication, as the pre-planned secondary analysis, resulted in a similar effect size, however, this did not achieve statistical significance (pooled RR 1.14, 95% CI 0.97–1.32,  $P=0.10$ ; 3 RCTs, 36,543 patients, 1,169 [adjudicated] events) due in part to heterogeneity ( $I^2=42\%$ ) resulting in wider confidence intervals (the pooled result would be statistically significant if fixed effects meta-analysis, which ignores heterogeneity, is used: pooled RR 1.14, 95% CI 1.01–1.27,  $P=0.03$ ). Adding the results of the smaller trial that enrolled patients with class I–III NYHA HF, and also defined HF requiring hospitalization as a pre-specified secondary outcome that was adjudicated by outcome assessors blinded to treatment allocation, gives a pooled result that just achieves statistical significance (pooled RR 1.139, 95% CI 1.002–1.293,  $P=0.046$ ; 4 RCTs, 36,796 patients, 1,192 [adjudicated] events). There was no difference in the pooled result of the 3 larger RCTs with cardiovascular primary outcomes and the pooled result of the smaller RCTs (interaction  $P=0.54$ ) (Figure 2).

Differences between pooled RR for individual DPP-4 inhibitors (Figure 3) did not achieve statistical significance. The most extreme difference was between saxagliptin, dominated by the results of SAVOR-TIMI 53, suggesting a statistically-significant increased risk of HF requiring hospitalization (pooled RR 1.22, 95% CI 1.03-1.44,  $P=0.02$ ,  $I^2=0\%$ ; 9 RCTs, 20,880 patients, 536 events), and sitagliptin,

dominated by the results of TECOS, suggesting no difference in risk (pooled RR 1.01, 95% CI 0.85-1.21,  $P=0.89$ ,  $I^2=0\%$ ; 10 RCTs, 21,218 patients, 468 events); however, even this difference in pooled RR between saxagliptin and sitagliptin did not achieve statistical significance (interaction  $P=0.13$  [interaction  $P=0.07$  comparing RR for only SAVOR-TIMI 53 vs. RR for only TECOS]).

In *post hoc* analysis, only SAVOR TIMI-53 and EXAMINE provided data for patients with and without a prior history of HF. HF requiring hospitalization rates were considerably higher in patients with (359/3638[9.9%]) vs without (353/3638[1.9%]) prior history of HF but the increase was concentrated in patients without (RR 1.42, 95%CI 1.15-1.74) rather than with (RR 1.08, 95%CI 0.89-1.31) prior history of HF (interaction  $p=0.06$ )(Figure 4); though cautious interpretation is needed given the limited data.

## Interpretation

Pooled data from all RCTs ( $n=79,867$ ) in which intervention and control patients differed only by DPP-4 inhibitor therapy suggest that DPP-4 inhibitors increase the risk of HF requiring hospitalization by 13%. This increase is statistically significant if data from both large and small high-quality RCTs are included, or if data from the 3 large RCTs<sup>4-8</sup> and 1 smaller RCT<sup>104</sup> that defined HF requiring hospitalization as a pre-specified secondary outcome adjudicated by outcome assessors blinded to treatment allocation are included. If however, data from only the 3 large RCTs with primary cardiovascular outcomes are included,<sup>4-8</sup> the magnitude remains numerically similar but is no longer statistically significant, largely due to heterogeneity between the risk of HF with saxagliptin and sitagliptin. Unfortunately, the current data do not have sufficient statistical power to definitively answer either 1) the question of whether DPP-4 inhibitors as a class increase HF given pooled treatment effect p-values ranging from 0.03-0.10 depending on whether or not the smaller RCT data are included, or 2) whether DPP-4 inhibitors exhibit

1  
2  
3  
4  
5  
6  
7  
8  
9  
10  
11  
12  
13  
14  
15  
16  
17  
18  
19  
20  
21  
22  
23  
24  
25  
26  
27  
28  
29  
30  
31  
32  
33  
34  
35  
36  
37  
38  
39  
40  
41  
42  
43  
44  
45  
46  
47  
48  
49  
50  
51  
52  
53  
54  
55  
56  
57  
58  
59  
60

significant within class differences (in which case pooling would not be appropriate) given interaction p-values ranging from 0.07-0.13 comparing results between the two medications with the most extreme safety (sitagliptin) or harm (saxagliptin) results. Results from the two ongoing DPP-4 inhibitor vs. placebo cardiovascular-safety RCTs will be important as they could have an impact on the pooled risk estimates for HF among the cardiovascular-safety RCTs (see Additional Results in on-line appendix) which emphasizes the importance of ongoing trials to resolve the question whether DPP-4 inhibitors as a class increase HF. Because there are only single large cardiovascular safety RCTs for each specific DPP-4 inhibitor and few head-to-head comparisons (our search identified eleven small short-term RCTs<sup>23,128,137-145</sup> directly comparing agents but none reported any HF events), the ongoing cardiovascular-safety trials will be less helpful in identifying differential effects among DPP-4 inhibitors.

In comparison to previous systematic reviews,<sup>146-151</sup> ours is the only one to focus on RCTs in which randomized groups differed by DPP-4 inhibitor treatment to avoid the confounding effect of other medications, some of which are known to independently increase or decrease the risk of HF,<sup>12,152</sup> and the only one to statistically compare differences in HF outcomes between different agents. Our meta-analysis includes from 4 to 29 more RCTs enrolling 1,639-19,339 more patients than other meta-analyses (Table 4). Moreover, we avoided inadvertently double counting RCTs and used all HF events for EXAMINE and the most recently published data for VIVID, unlike some of the previously published meta-analyses (Table 4). With the larger number of included RCTs, our pooled results demonstrate statistically higher overall HF risk, unlike other post-TECOS meta-analyses, but only if data from all (placebo-controlled) RCTs are included. Ours is also the first to compare pooled HF hospitalization rates by previous HF history suggesting, based on limited data, that increased risk from DPP-4 inhibitors may be concentrated in patients without previous HF.

Our meta-analysis has limitations. It included relatively small trials with variable inclusion criteria, short follow-up times (though we specified minimum of 24 weeks which is longer than the 12 weeks follow-up used in some other meta-analyses<sup>147,148,150</sup>) and non-adjudicated outcomes. However, 96% of the HF outcomes were blindly adjudicated and pooled results are dominated by the large cardiovascular safety trials with adjudicated outcomes: point estimates are similar regardless of whether the data from the smaller trials are included (1.14 vs. 1.13), though inclusion of the additional data from the smaller RCTs narrows the confidence intervals resulting in statistical significance being achieved. This is in contrast to a highly-cited rosiglitazone meta-analysis<sup>153</sup> where smaller RCTs with non-adjudicated outcomes drove overall results and the effect on both myocardial infarction and cardiovascular death changed depending on how the analysis was conducted.<sup>154</sup> Nevertheless, the absolute increase in risk during follow up, even limiting the analysis only to the three cardiovascular safety RCTs is small at around 0.4%(= 623/18313-546/18230)(Figure 2) corresponding to a number needed to harm of (1/0.004=)246 (median follow up 2.4y). Studies in patients with previous HF, and longer follow up data may uncover higher risks, and are needed to explore longer-term safety of these lifelong therapies. Although we limited our analysis to placebo-controlled trials, in trials targeting A1C, placebo-treated patients would likely have received more non-DPP-4 inhibitor medications.

In summary, our updated systematic review includes more RCTs than others and is the only post-TECOS meta-analysis to demonstrate statistically higher, albeit small, overall HF risk, but only if data from all placebo-controlled RCTs are included. It is also the only meta-analysis to statistically compare differences in HF outcomes by different agents and by previous history of HF. However, despite pooled data from 79,867 patients, whether DPP-4 inhibitors increase HF overall, or exhibit within-class differences (which would make pooling between agents inappropriate), remains unresolved highlighting the importance of ongoing trials which will address the overall but not class difference

1  
2  
3  
4  
5  
6  
7  
8  
9  
10  
11  
12  
13  
14  
15  
16  
17  
18  
19  
20  
21  
22  
23  
24  
25  
26  
27  
28  
29  
30  
31  
32  
33  
34  
35  
36  
37  
38  
39  
40  
41  
42  
43  
44  
45  
46  
47  
48  
49  
50  
51  
52  
53  
54  
55  
56  
57  
58  
59  
60

question. Nevertheless, given the current data, it seems prudent to follow the FDA’s Drug Safety Communication<sup>9</sup> and be cautious about prescribing saxagliptin and alogliptin in patients with established HF, or at high risk of developing HF (previous HF, low eGFR and/or elevated NT-proBNP), and consider discontinuing these medications in any patient who develops heart failure.

Confidential

**Funding:** SV is the Canada Research Chair (CRC) in Atherosclerosis. KAC is supported by a New Investigator award from the CIHR. JOF is supported by a Clinician-Scientist Award from the Canadian Institutes of Health Research (CIHR). The CRC program and CIHR had no role in the design and conduct of the study; collection, management, analysis, and interpretation of the data; preparation, review, or approval of the manuscript; and decision to submit the manuscript for publication.

**Contributors:** Subodh Verma, Ronald Goldenberg and Jan Friedrich contributed to the conception, design, acquisition, analysis and interpretation of data, drafted and revised the article. Deepak Bhatt, Michael Farkouh, Kim Connelly and Lawrence Leiter contributed to data interpretation and revised the article critically for important intellectual content. Adrian Quan and Hwee Teoh contributed to the acquisition of data, drafted and revised the article. All of the authors gave final approval to the version to be published and agree to act as guarantors of the work.

**Competing Interests:** Subodh Verma has received speaker honoraria and/or grants from Amgen, AstraZeneca, Merck, Novartis, Sanofi, and Valeant. Ronald Goldenberg has received research support from AstraZeneca, Böehringer Ingelheim, Eli Lilly, GlaxoSmithKline, Merck, Novartis, Novo Nordisk, Takeda; has served on advisory panels for AstraZeneca, Böehringer Ingelheim, Eli Lilly, Merck, Novo Nordisk, and Takeda; has participated in speaker bureaus for AstraZeneca, Böehringer Ingelheim, Eli Lilly, Merck, and Novo Nordisk and Servier; and has served as a consultant for AstraZeneca, Böehringer Ingelheim, Eli Lilly, Merck, Novo Nordisk and Takeda. Deepak Bhatt discloses the following relationships - Advisory Board: Cardax, Elsevier Practice Update Cardiology, Medscape Cardiology, Regado Biosciences; Board of Directors: Boston VA Research Institute, Society of Cardiovascular Patient Care;

1  
2  
3  
4  
5  
6  
7  
8  
9  
10  
11  
12  
13  
14  
15  
16  
17  
18  
19  
20  
21  
22  
23  
24  
25  
26  
27  
28  
29  
30  
31  
32  
33  
34  
35  
36  
37  
38  
39  
40  
41  
42  
43  
44  
45  
46  
47  
48  
49  
50  
51  
52  
53  
54  
55  
56  
57  
58  
59  
60

Chair: American Heart Association Quality Oversight Committee; Data Monitoring Committees: Duke Clinical Research Institute, Harvard Clinical Research Institute, Mayo Clinic, Population Health Research Institute; Honoraria: American College of Cardiology (Senior Associate Editor, Clinical Trials and News, ACC.org), Belvoir Publications (Editor in Chief, Harvard Heart Letter), Duke Clinical Research Institute (clinical trial steering committees), Harvard Clinical Research Institute (clinical trial steering committee), HMP Communications (Editor in Chief, Journal of Invasive Cardiology), Journal of the American College of Cardiology (Guest Editor; Associate Editor), Population Health Research Institute (clinical trial steering committee), Slack Publications (Chief Medical Editor, Cardiology Today’s Intervention), Society of Cardiovascular Patient Care (Secretary/Treasurer), WebMD (CME steering committees); Other: Clinical Cardiology (Deputy Editor), NCDR-ACTION Registry Steering Committee (Vice-Chair), VA CART Research and Publications Committee (Chair); Research Funding: Amarin, AstraZeneca (including for serving as the co-PI of SAVOR-TIMI 53), Bristol-Myers Squibb, Eisai, Ethicon, Forest Laboratories, Ischemix, Medtronic, Pfizer, Roche, Sanofi Aventis, The Medicines Company; Royalties: Elsevier (Editor, Cardiovascular Intervention: A Companion to Braunwald’s Heart Disease); Site Co-Investigator: Biotronik, Boston Scientific, St. Jude Medical; Trustee: American College of Cardiology; Unfunded Research: FlowCo, PLx Pharma, Takeda. Kim Connelly has received support from Astra Zeneca/Bristol Myer Squibb, consultancy fees from Servier, Merck, Janssen and Boehringer Ingelheim, travel support from Bristol Myer Squibb and holds a patent with Boehringer Ingelheim for linagliptin and heart failure with preserved ejection fraction. Lawrence Leiter has received research funding from, has provided CME on behalf of, and/or has acted as an advisor to AstraZeneca, Böehringer Ingelheim, Eli Lilly, GlaxoSmithKline, Janssen, Merck, NovoNordisk, Pfizer, Sanofi, and Servier. All other authors have reported that they have no relationships relevant to the contents of this paper to disclose.



## References

1. Connelly KA, Yan AT, Leiter LA, Bhatt DL, Verma S. Cardiovascular implications of hypoglycemia in diabetes. *Circulation*. 2015;132:2345-50.
2. Gilbert RE, Krum H. Heart failure in diabetes: effects of anti-hyperglycaemic drug therapy. *Lancet*. 2015;385:2107-17.
3. McMurray JJ, Gerstein HC, Holman RR, Pfeffer MA. Heart failure: a cardiovascular outcome in diabetes that can no longer be ignored. *Lancet Diabetes Endocrinol*. 2014;2:843-51.
4. Scirica BM, Bhatt DL, Braunwald E, et al. Saxagliptin and cardiovascular outcomes in patients with type 2 diabetes mellitus. *N Engl J Med*. 2013;369:1317-26.
5. Scirica BM, Braunwald E, Raz I, et al. Heart failure, saxagliptin, and diabetes mellitus: observations from the SAVOR-TIMI 53 randomized trial. *Circulation*. 2014;130:1579-88.
6. White WB, Cannon CP, Heller SR, et al. Alogliptin after acute coronary syndrome in patients with type 2 diabetes. *N Engl J Med*. 2013;369:1327-35.
7. Zannad F, Cannon CP, Cushman WC, et al. Heart failure and mortality outcomes in patients with type 2 diabetes taking alogliptin versus placebo in EXAMINE: a multicentre, randomised, double-blind trial. *Lancet*. 2015;385:2067-76.
8. Green JB, Bethel MA, Armstrong PW, et al. Effect of Sitagliptin on Cardiovascular Outcomes in Type 2 Diabetes. *N Engl J Med*. 2015;373:232-42.
9. U.S. Food and Drug Administration. Diabetes Medications Containing Saxagliptin and Alogliptin: Drug Safety Communication - Risk of Heart Failure. Silver Spring, MD, USA: U.S. Food and Drug Administration; 2016.
10. Cavender MA, Steg PG, Smith SC, et al. Impact of Diabetes on Hospitalization for Heart Failure, Cardiovascular Events, and Death: Outcomes at 4 Years from the REACH Registry. *Circulation*. 2015;132:923-31.
11. Udell JA, Cavender MA, Bhatt DL, Chatterjee S, Farkouh ME, Scirica BM. Glucose-lowering drugs or strategies and cardiovascular outcomes in patients with or at risk for type 2 diabetes: a meta-analysis of randomised controlled trials. *Lancet Diabetes Endocrinol*. 2015;3:356-66.
12. Zinman B, Wanner C, Lachin JM, et al. Empagliflozin, Cardiovascular Outcomes, and Mortality in Type 2 Diabetes. *N Engl J Med*. 2015;373:2117-28.
13. Montori VM, Devereaux PJ, Adhikari NK, et al. Randomized trials stopped early for benefit: a systematic review. *JAMA*. 2005;294:2203-9.
14. Higgins JP, Altman DG, Gotzsche PC, et al. The Cochrane Collaboration's tool for assessing risk of bias in randomised trials. *BMJ*. 2011;343:d5928.
15. Dejager S, Razac S, Foley JE, Schweizer A. Vildagliptin in drug-naïve patients with type 2 diabetes: a 24-week, double-blind, randomized, placebo-controlled, multiple-dose study. *Horm Metab Res*. 2007;39:218-23.
16. Kothny W, Foley J, Kozlovski P, Shao Q, Gallwitz B, Lukashevich V. Improved glycaemic control with vildagliptin added to insulin, with or without metformin, in patients with type 2 diabetes mellitus. *Diabetes Obes Metab*. 2013;15:252-7.
17. Kothny W, Shao Q, Groop PH, Lukashevich V. One-year safety, tolerability and efficacy of vildagliptin in patients with type 2 diabetes and moderate or severe renal impairment. *Diabetes Obes Metab*. 2012;14:1032-9.
18. Lukashevich V, Schweizer A, Shao Q, Groop PH, Kothny W. Safety and efficacy of vildagliptin versus placebo in patients with type 2 diabetes and moderate or severe renal impairment: a

prospective 24-week randomized placebo-controlled trial. *Diabetes Obes Metab.* 2011;13:947-54.

19. Pi-Sunyer FX, Schweizer A, Mills D, Dejager S. Efficacy and tolerability of vildagliptin monotherapy in drug-naïve patients with type 2 diabetes. *Diabetes Res Clin Pract.* 2007;76:132-8.

20. Su Y, Su YL, Lv LF, Wang LM, Li QZ, Zhao ZG. A randomized controlled clinical trial of vildagliptin plus metformin combination therapy in patients with type II diabetes mellitus. *Exp Ther Med.* 2014;7:799-803.

21. Bergenstal RM, Forti A, Chiasson JL, Woloschak M, Boldrin M, Balena R. Efficacy and safety of taspoglutide versus sitagliptin for type 2 diabetes mellitus (T-emerge 4 trial). *Diabetes Ther.* 2012;3:13.

22. Sato S, Saisho Y, Kou K, et al. Efficacy and safety of sitagliptin added to insulin in Japanese patients with type 2 diabetes: the EDIT randomized trial. *PLoS One.* 2015;10:e0121988.

23. Inagaki N, Onouchi H, Maezawa H, Kuroda S, Kaku K. Once-weekly trelagliptin versus daily alogliptin in Japanese patients with type 2 diabetes: a randomised, double-blind, phase 3, non-inferiority study. *Lancet Diabetes Endocrinol.* 2015;3:191-7.

24. Linjawi S, Sothiratnam R, Sari R, Andersen H, Hiort LC, Rao P. The study of once- and twice-daily biphasic insulin aspart 30 (BIAsp 30) with sitagliptin, and twice-daily BIAsp 30 without sitagliptin, in patients with type 2 diabetes uncontrolled on sitagliptin and metformin-The Sit2Mix trial. *Prim Care Diabetes.* 2015;9:370-6.

25. Green JB, Bethel MA, Paul SK, et al. Rationale, design, and organization of a randomized, controlled Trial Evaluating Cardiovascular Outcomes with Sitagliptin (TECOS) in patients with type 2 diabetes and established cardiovascular disease. *Am Heart J.* 2013;166:983-9 e7.

26. Nauck MA, Ellis GC, Fleck PR, Wilson CA, Mekki Q, Alogliptin Study G. Efficacy and safety of adding the dipeptidyl peptidase-4 inhibitor alogliptin to metformin therapy in patients with type 2 diabetes inadequately controlled with metformin monotherapy: a multicentre, randomised, double-blind, placebo-controlled study. *Int J Clin Pract.* 2009;63:46-55.

27. DeFronzo RA, Fleck PR, Wilson CA, Mekki Q, Alogliptin Study G. Efficacy and safety of the dipeptidyl peptidase-4 inhibitor alogliptin in patients with type 2 diabetes and inadequate glycemic control: a randomized, double-blind, placebo-controlled study. *Diabetes Care.* 2008;31:2315-7.

28. Rosenstock J, Inzucchi SE, Seufert J, Fleck PR, Wilson CA, Mekki Q. Initial combination therapy with alogliptin and pioglitazone in drug-naïve patients with type 2 diabetes. *Diabetes Care.* 2010;33:2406-8.

29. Pratley RE, Kipnes MS, Fleck PR, Wilson C, Mekki Q, Alogliptin Study G. Efficacy and safety of the dipeptidyl peptidase-4 inhibitor alogliptin in patients with type 2 diabetes inadequately controlled by glyburide monotherapy. *Diabetes Obes Metab.* 2009;11:167-76.

30. Pratley RE, Reusch JE, Fleck PR, Wilson CA, Mekki Q, Alogliptin Study G. Efficacy and safety of the dipeptidyl peptidase-4 inhibitor alogliptin added to pioglitazone in patients with type 2 diabetes: a randomized, double-blind, placebo-controlled study. *Curr Med Res Opin.* 2009;25:2361-71.

31. Rosenstock J, Rendell MS, Gross JL, Fleck PR, Wilson CA, Mekki Q. Alogliptin added to insulin therapy in patients with type 2 diabetes reduces HbA(1C) without causing weight gain or increased hypoglycaemia. *Diabetes Obes Metab.* 2009;11:1145-52.

32. Pratley RE, Fleck P, Wilson C. Efficacy and safety of initial combination therapy with alogliptin plus metformin versus either as monotherapy in drug-naïve patients with type 2 diabetes: a randomized, double-blind, 6-month study. *Diabetes Obes Metab.* 2014;16:613-21.

33. DeFronzo RA, Burant CF, Fleck P, Wilson C, Mekki Q, Pratley RE. Efficacy and tolerability of the DPP-4 inhibitor alogliptin combined with pioglitazone, in metformin-treated patients with type 2 diabetes. *J Clin Endocrinol Metab.* 2012;97:1615-22.
34. Gomis R, Espadero RM, Jones R, Woerle HJ, Dugi KA. Efficacy and safety of initial combination therapy with linagliptin and pioglitazone in patients with inadequately controlled type 2 diabetes: a randomized, double-blind, placebo-controlled study. *Diabetes Obes Metab.* 2011;13:653-61.
35. Haak T, Meinicke T, Jones R, Weber S, von Eynatten M, Woerle HJ. Initial combination of linagliptin and metformin improves glycaemic control in type 2 diabetes: a randomized, double-blind, placebo-controlled study. *Diabetes Obes Metab.* 2012;14:565-74.
36. Haak T, Meinicke T, Jones R, Weber S, von Eynatten M, Woerle HJ. Initial combination of linagliptin and metformin in patients with type 2 diabetes: efficacy and safety in a randomised, double-blind 1-year extension study. *Int J Clin Pract.* 2013;67:1283-93.
37. Owens DR, Swallow R, Dugi KA, Woerle HJ. Efficacy and safety of linagliptin in persons with type 2 diabetes inadequately controlled by a combination of metformin and sulphonylurea: a 24-week randomized study. *Diabet Med.* 2011;28:1352-61.
38. Taskinen MR, Rosenstock J, Tamminen I, et al. Safety and efficacy of linagliptin as add-on therapy to metformin in patients with type 2 diabetes: a randomized, double-blind, placebo-controlled study. *Diabetes Obes Metab.* 2011;13:65-74.
39. Thrasher J, Daniels K, Patel S, Whetteckey J, Woerle HJ. Efficacy and Safety of Linagliptin in Black/African American Patients with Type 2 Diabetes: A 6-month, Randomized, Double-blind, Placebo-controlled Study. *Endocr Pract.* 2014;20:412-20.
40. Barnett AH, Huisman H, Jones R, von Eynatten M, Patel S, Woerle HJ. Linagliptin for patients aged 70 years or older with type 2 diabetes inadequately controlled with common antidiabetes treatments: a randomised, double-blind, placebo-controlled trial. *Lancet.* 2013;382:1413-23.
41. Bajaj M, Gilman R, Patel S, Kempthorne-Rawson J, Lewis-D'Agostino D, Woerle HJ. Linagliptin improved glycaemic control without weight gain or hypoglycaemia in patients with type 2 diabetes inadequately controlled by a combination of metformin and pioglitazone: a 24-week randomized, double-blind study. *Diabet Med.* 2014;31:1505-14.
42. Del Prato S, Barnett AH, Huisman H, Neubacher D, Woerle HJ, Dugi KA. Effect of linagliptin monotherapy on glycaemic control and markers of beta-cell function in patients with inadequately controlled type 2 diabetes: a randomized controlled trial. *Diabetes Obes Metab.* 2011;13:258-67.
43. McGill JB, Sloan L, Newman J, et al. Long-term efficacy and safety of linagliptin in patients with type 2 diabetes and severe renal impairment: a 1-year, randomized, double-blind, placebo-controlled study. *Diabetes Care.* 2013;36:237-44.
44. Yki-Jarvinen H, Rosenstock J, Duran-Garcia S, et al. Effects of adding linagliptin to basal insulin regimen for inadequately controlled type 2 diabetes: a  $\geq$ 52-week randomized, double-blind study. *Diabetes Care.* 2013;36:3875-81.
45. DeFronzo RA, Lewin A, Patel S, et al. Combination of empagliflozin and linagliptin as second-line therapy in subjects with type 2 diabetes inadequately controlled on metformin. *Diabetes Care.* 2015;38:384-93.
46. Lewin A, DeFronzo RA, Patel S, et al. Initial combination of empagliflozin and linagliptin in subjects with type 2 diabetes. *Diabetes Care.* 2015;38:394-402.
47. Study to Compare the Efficacy and Safety of Administration of the Fix Dose Combination of Linagliptin Plus Metformin in Drug naïve Type 2 Patients. ClinicalTrials.gov; 2015. <https://clinicaltrials.gov/ct2/show/NCT01708902>. Accessed June 29, 2015.

48. 30 Week Parallel Group Comparison Study of Linagliptin + Pioglitazone (5+15, 5+30 and 5+45 mg) qd Versus Respective Monotherapies, Followed by a Comparison of 5mg+30mg and 5mg+45mg Versus Respective Monotherapies in Type 2 Diabetes for up to 54 Weeks. NCT01183013. ClinicalTrials.gov; 2015. <https://clinicaltrials.gov/ct2/show/NCT01183013>. Accessed June 29, 2015.

49. Efficacy and Safety Study of Linagliptin (5 mg Administered Orally Once Daily) Over 24 Weeks, in Drug naïve or Previously Treated Type 2 Diabetic Patients With Insufficient Glycaemic Control. NCT01214239. ClinicalTrials.gov; 2015. <https://clinicaltrials.gov/ct2/show/NCT01214239>. Accessed June 29, 2015.

50. Efficacy and Safety Study of Linagliptin (5 mg Administered Orally Once Daily) Over 24 Weeks in Type 2 Diabetic Patients With Insufficient Glycaemic Control Despite Metformin Therapy. NCT01215097. ClinicalTrials.gov; 2015. <https://clinicaltrials.gov/ct2/show/NCT01215097>. Accessed June 29, 2015.

51. Pfutzner A, Paz-Pacheco E, Allen E, Frederich R, Chen R, Investigators CV. Initial combination therapy with saxagliptin and metformin provides sustained glycaemic control and is well tolerated for up to 76 weeks. *Diabetes Obes Metab*. 2011;13:567-76.

52. Jadzinsky M, Pfutzner A, Paz-Pacheco E, et al. Saxagliptin given in combination with metformin as initial therapy improves glycaemic control in patients with type 2 diabetes compared with either monotherapy: a randomized controlled trial. *Diabetes Obes Metab*. 2009;11:611-22.

53. Barnett AH, Charbonnel B, Li J, Donovan M, Fleming D, Iqbal N. Saxagliptin add-on therapy to insulin with or without metformin for type 2 diabetes mellitus: 52-week safety and efficacy. *Clin Drug Investig*. 2013;33:707-17.

54. Chacra AR, Tan GH, Ravichandran S, List J, Chen R, Investigators CV. Safety and efficacy of saxagliptin in combination with submaximal sulphonylurea versus up-titrated sulphonylurea over 76 weeks. *Diab Vasc Dis Res*. 2011;8:150-9.

55. DeFronzo RA, Hissa MN, Garber AJ, et al. The efficacy and safety of saxagliptin when added to metformin therapy in patients with inadequately controlled type 2 diabetes with metformin alone. *Diabetes Care*. 2009;32:1649-55.

56. Rosenstock J, Gross JL, Aguilar-Salinas C, et al. Long-term 4-year safety of saxagliptin in drug-naïve and metformin-treated patients with Type 2 diabetes. *Diabet Med*. 2013;30:1472-6.

57. Frederich R, McNeill R, Berglind N, Fleming D, Chen R. The efficacy and safety of the dipeptidyl peptidase-4 inhibitor saxagliptin in treatment-naïve patients with type 2 diabetes mellitus: a randomized controlled trial. *Diabetol Metab Syndr*. 2012;4:36.

58. Hollander PL, Li J, Frederich R, Allen E, Chen R, Investigators CV. Safety and efficacy of saxagliptin added to thiazolidinedione over 76 weeks in patients with type 2 diabetes mellitus. *Diab Vasc Dis Res*. 2011;8:125-35.

59. Nowicki M, Rychlik I, Haller H, et al. Long-term treatment with the dipeptidyl peptidase-4 inhibitor saxagliptin in patients with type 2 diabetes mellitus and renal impairment: a randomised controlled 52-week efficacy and safety study. *Int J Clin Pract*. 2011;65:1230-9.

60. Pan CY, Yang W, Tou C, Gause-Nilsson I, Zhao J. Efficacy and safety of saxagliptin in drug-naïve Asian patients with type 2 diabetes mellitus: a randomized controlled trial. *Diabetes Metab Res Rev*. 2012;28:268-75.

61. Rosenstock J, Aguilar-Salinas C, Klein E, et al. Effect of saxagliptin monotherapy in treatment-naïve patients with type 2 diabetes. *Curr Med Res Opin*. 2009;25:2401-11.

62. Moses RG, Kalra S, Brook D, et al. A randomized controlled trial of the efficacy and safety of saxagliptin as add-on therapy in patients with type 2 diabetes and inadequate glycaemic control on metformin plus a sulphonylurea. *Diabetes Obes Metab*. 2014;16:443-50.

63. Rosenstock J, Hansen L, Zee P, et al. Dual add-on therapy in type 2 diabetes poorly controlled with metformin monotherapy: a randomized double-blind trial of saxagliptin plus dapagliflozin addition versus single addition of saxagliptin or dapagliflozin to metformin. *Diabetes Care*. 2015;38:376-83.
64. Charbonnel B, Karasik A, Liu J, Wu M, Meininger G, Sitagliptin Study G. Efficacy and safety of the dipeptidyl peptidase-4 inhibitor sitagliptin added to ongoing metformin therapy in patients with type 2 diabetes inadequately controlled with metformin alone. *Diabetes Care*. 2006;29:2638-43.
65. Hermansen K, Kipnes M, Luo E, et al. Efficacy and safety of the dipeptidyl peptidase-4 inhibitor, sitagliptin, in patients with type 2 diabetes mellitus inadequately controlled on glimepiride alone or on glimepiride and metformin. *Diabetes Obes Metab*. 2007;9:733-45.
66. Henry RR, Staels B, Fonseca VA, et al. Efficacy and safety of initial combination treatment with sitagliptin and pioglitazone--a factorial study. *Diabetes Obes Metab*. 2014;16:223-30.
67. Raz I, Chen Y, Wu M, et al. Efficacy and safety of sitagliptin added to ongoing metformin therapy in patients with type 2 diabetes. *Curr Med Res Opin*. 2008;24:537-50.
68. Vilsboll T, Rosenstock J, Yki-Jarvinen H, et al. Efficacy and safety of sitagliptin when added to insulin therapy in patients with type 2 diabetes. *Diabetes Obes Metab*. 2010;12:167-77.
69. Williams-Herman D, Johnson J, Teng R, et al. Efficacy and safety of sitagliptin and metformin as initial combination therapy and as monotherapy over 2 years in patients with type 2 diabetes. *Diabetes Obes Metab*. 2010;12:442-51.
70. Goldstein BJ, Feinglos MN, Luncford JK, Johnson J, Williams-Herman DE, Sitagliptin 036 Study G. Effect of initial combination therapy with sitagliptin, a dipeptidyl peptidase-4 inhibitor, and metformin on glycemic control in patients with type 2 diabetes. *Diabetes Care*. 2007;30:1979-87.
71. Yoon KH, Steinberg H, Teng R, et al. Efficacy and safety of initial combination therapy with sitagliptin and pioglitazone in patients with type 2 diabetes: a 54-week study. *Diabetes Obes Metab*. 2012;14:745-52.
72. Yoon KH, Shockey GR, Teng R, et al. Effect of initial combination therapy with sitagliptin, a dipeptidyl peptidase-4 inhibitor, and pioglitazone on glycemic control and measures of beta-cell function in patients with type 2 diabetes. *Int J Clin Pract*. 2011;65:154-64.
73. Evaluate Saxagliptin in Adult Indian Patients With Type 2 Diabetes Inadequate Glycemic Control. NCT00918879. ClinicalTrials.gov; 2011. <https://clinicaltrials.gov/ct2/show/NCT00918879>. Accessed July 03, 2015.
74. Yang W, Pan CY, Tou C, Zhao J, Gause-Nilsson I. Efficacy and safety of saxagliptin added to metformin in Asian people with type 2 diabetes mellitus: a randomized controlled trial. *Diabetes Res Clin Pract*. 2011;94:217-24.
75. Study to Assess the Efficacy and Safety of Sitagliptin Added to the Regimen of Patients With Type 2 Diabetes Mellitus With Inadequate Glycemic Control on Metformin (0431-189). NCT00875394. ClinicalTrials.gov; 2015. <https://clinicaltrials.gov/ct2/show/NCT00875394>. Accessed July 03, 2015.
76. Barzilai N, Guo H, Mahoney EM, et al. Efficacy and tolerability of sitagliptin monotherapy in elderly patients with type 2 diabetes: a randomized, double-blind, placebo-controlled trial. *Curr Med Res Opin*. 2011;27:1049-58.
77. Yang W, Guan Y, Shentu Y, et al. The addition of sitagliptin to ongoing metformin therapy significantly improves glycemic control in Chinese patients with type 2 diabetes. *J Diabetes*. 2012;4:227-37.
78. Rosenstock J, Brazg R, Andryuk PJ, Lu K, Stein P, Sitagliptin Study G. Efficacy and safety of the dipeptidyl peptidase-4 inhibitor sitagliptin added to ongoing pioglitazone therapy in patients



with type 2 diabetes: a 24-week, multicenter, randomized, double-blind, placebo-controlled, parallel-group study. *Clin Ther.* 2006;28:1556-68.

79. Aschner P, Kipnes MS, Lunceford JK, et al. Effect of the dipeptidyl peptidase-4 inhibitor sitagliptin as monotherapy on glycemic control in patients with type 2 diabetes. *Diabetes Care.* 2006;29:2632-7.

80. Fonseca V, Staels B, Morgan JD, 2nd, et al. Efficacy and safety of sitagliptin added to ongoing metformin and pioglitazone combination therapy in a randomized, placebo-controlled, 26-week trial in patients with type 2 diabetes. *J Diabetes Complications.* 2013;27:177-83.

81. Olansky L, Reasner C, Seck TL, et al. A treatment strategy implementing combination therapy with sitagliptin and metformin results in superior glycaemic control versus metformin monotherapy due to a low rate of addition of antihyperglycaemic agents. *Diabetes Obes Metab.* 2011;13:841-9.

82. Beta-Cell Function and Sitagliptin Trial (BEST). NCT00420511. ClinicalTrials.gov; 2011. <https://clinicaltrials.gov/ct2/show/NCT00420511>. Accessed July 03, 2015.

83. Dobs AS, Goldstein BJ, Aschner P, et al. Efficacy and safety of sitagliptin added to ongoing metformin and rosiglitazone combination therapy in a randomized placebo-controlled 54-week trial in patients with type 2 diabetes. *J Diabetes.* 2013;5:68-79.

84. A Study to Evaluate the Safety and Efficacy of Sitagliptin 100 mg in Participants With Type 2 Diabetes Mellitus Who Have Inadequate Glycemic Control (MK-0431-229). NCT01076075. ClinicalTrials.gov; 2015. <https://clinicaltrials.gov/ct2/show/NCT01076075>. Accessed July 06, 2015.

85. Lavalley-Gonzalez FJ, Januszewicz A, Davidson J, et al. Efficacy and safety of canagliflozin compared with placebo and sitagliptin in patients with type 2 diabetes on background metformin monotherapy: a randomised trial. *Diabetologia.* 2013;56:2582-92.

86. Mathieu C, Shankar RR, Lorber D, et al. A Randomized Clinical Trial to Evaluate the Efficacy and Safety of Co-Administration of Sitagliptin with Intensively Titrated Insulin Glargine. *Diabetes Ther.* 2015;6:127-42.

87. Roden M, Weng J, Eilbracht J, et al. Empagliflozin monotherapy with sitagliptin as an active comparator in patients with type 2 diabetes: a randomised, double-blind, placebo-controlled, phase 3 trial. *Lancet Diabetes Endocrinol.* 2013;1:208-19.

88. Clinical Trial to Evaluate the Safety and Efficacy of the Addition of Sitagliptin in Participants With Type 2 Diabetes Mellitus Receiving Acarbose Monotherapy (MK-0431-130). NCT01177384. ClinicalTrials.gov; 2015. <https://clinicaltrials.gov/ct2/show/NCT01177384>. Accessed July 06, 2015.

89. Skrivanek Z, Gaydos BL, Chien JY, et al. Dose-finding results in an adaptive, seamless, randomized trial of once-weekly dulaglutide combined with metformin in type 2 diabetes patients (AWARD-5). *Diabetes Obes Metab.* 2014;16:748-56.

90. Efficacy and Safety of Albiglutide in Treatment of Type 2 Diabetes. ClinicalTrials.gov; 2014. <https://clinicaltrials.gov/ct2/show/NCT00838903>. Accessed July 06, 2015.

91. Safety and Efficacy of Co-Administration of Sitagliptin and Metformin in China (MK-0431-121). NCT01076088. ClinicalTrials.gov; 2015. <https://clinicaltrials.gov/ct2/show/NCT01076088?term=NCT01076088&rank=1>. Accessed July 06, 2015.

92. Treatment Intensification With Biphasic Insulin Aspart 30 in Subjects With Type 2 Diabetes Inadequately Controlled on Sitagliptin and Metformin (SIT2MIX). NCT01519674. ClinicalTrials.gov; 2014.

- <https://clinicaltrials.gov/ct2/show/NCT01519674?term=NCT01519674&rank=1>. Accessed July 06, 2015.
93. A Study in China Evaluating the Safety and Efficacy of Adding Sitagliptin to Stable Therapy With Sulfonylurea With or Without Metformin in Participants With Type 2 Diabetes Mellitus (T2DM) (MK-0431-253). NCT01590771. ClinicalTrials.gov; 2015.  
<https://clinicaltrials.gov/ct2/show/NCT01590771?term=NCT01590771&rank=1>. Accessed July 06, 2015.
  94. A Study in China Evaluating the Safety and Efficacy of Adding Sitagliptin to Stable Therapy With Insulin With or Without Metformin in Participants With Type 2 Diabetes Mellitus (T2DM) (MK-0431-254). NCT01590797. ClinicalTrials.gov; 2015.  
<https://clinicaltrials.gov/ct2/show/NCT01590797?term=NCT01590797&rank=1>. Accessed July 06, 2015.
  95. Comparison Study of the Glycemic Effects, Safety, and Tolerability of Exenatide Once Weekly Suspension to Sitagliptin and Placebo in Subjects With Type 2 Diabetes Mellitus (DURATION-NEO-2). NCT01652729. ClinicalTrials.gov; 2015.  
<https://clinicaltrials.gov/ct2/show/NCT01652729?term=NCT01652729&rank=1>. Accessed July 06, 2015.
  96. Ishikawa S, Shimano M, Watarai M, et al. Impact of sitagliptin on carotid intima-media thickness in patients with coronary artery disease and impaired glucose tolerance or mild diabetes mellitus. *Am J Cardiol*. 2014;114:384-8.
  97. Derosa G, Carbone A, D'Angelo A, et al. A randomized, double-blind, placebo-controlled trial evaluating sitagliptin action on insulin resistance parameters and beta-cell function. *Expert Opin Pharmacother*. 2012;13:2433-42.
  98. Derosa G, Carbone A, D'Angelo A, et al. Variations in inflammatory biomarkers following the addition of sitagliptin in patients with type 2 diabetes not controlled with metformin. *Intern Med*. 2013;52:2179-87.
  99. Derosa G, Carbone A, Franzetti I, et al. Effects of a combination of sitagliptin plus metformin vs metformin monotherapy on glycemic control, beta-cell function and insulin resistance in type 2 diabetic patients. *Diabetes Res Clin Pract*. 2012;98:51-60.
  100. Derosa G, Ragonesi PD, Fogari E, et al. Sitagliptin added to previously taken antidiabetic agents on insulin resistance and lipid profile: a 2-year study evaluation. *Fundam Clin Pharmacol*. 2014;28:221-9.
  101. Bosi E, Camisasca RP, Collober C, Rochotte E, Garber AJ. Effects of vildagliptin on glucose control over 24 weeks in patients with type 2 diabetes inadequately controlled with metformin. *Diabetes Care*. 2007;30:890-5.
  102. Bosi E, Dotta F, Jia Y, Goodman M. Vildagliptin plus metformin combination therapy provides superior glycaemic control to individual monotherapy in treatment-naïve patients with type 2 diabetes mellitus. *Diabetes Obes Metab*. 2009;11:506-15.
  103. Fonseca V, Schweizer A, Albrecht D, Baron MA, Chang I, Dejager S. Addition of vildagliptin to insulin improves glycaemic control in type 2 diabetes. *Diabetologia*. 2007;50:1148-55.
  104. Krum H, Lukashevich V, Bolli GB, Kozlovski P, Kothny W, Ponikowski P. No significant difference in risk of heart failure hospitalization with vildagliptin in diabetic patients with systolic chronic heart failure: VIVID study. *Diabetes*. 2014; 63:A265. Available at:  
<https://ada.scientificposters.com/epsView.cfm?3p2FCsEYNWbDTo3F%2FeHb2yebkmUUub%2BzjwMzz1p8yNwOmLnTrCjEOCMF13rT0bNlz>.
  105. Scherbaum WA, Schweizer A, Mari A, et al. Efficacy and tolerability of vildagliptin in drug-naïve patients with type 2 diabetes and mild hyperglycaemia\*. *Diabetes Obes Metab*. 2008;10:675-82.

1  
2  
3 106. Scherbaum WA, Schweizer A, Mari A, et al. Evidence that vildagliptin attenuates deterioration of  
4 glycaemic control during 2-year treatment of patients with type 2 diabetes and mild  
5 hyperglycaemia. *Diabetes Obes Metab.* 2008;10:1114-24.  
6  
7 107. Strain WD, Lukashevich V, Kothny W, Hoellinger MJ, Paldanius PM. Individualised treatment  
8 targets for elderly patients with type 2 diabetes using vildagliptin add-on or lone therapy  
9 (INTERVAL): a 24 week, randomised, double-blind, placebo-controlled study. *Lancet.*  
10 2013;382:409-16.  
11 108. Vollmer M, Abletshauser C, Pennartz C, Meier JJ, Schmidt WE. Wirksamkeit und Sicherheit der  
12 frühen Kombination von Vildagliptin mit Metformin im Vergleich zu Placebo bei Patienten mit  
13 Typ 2 Diabetes. *Diabetologie und Stoffwechsel.* 2009;4:239.  
14 109. Garber AJ, Schweizer A, Baron MA, Rochotte E, Dejager S. Vildagliptin in combination with  
15 pioglitazone improves glycaemic control in patients with type 2 diabetes failing  
16 thiazolidinedione monotherapy: a randomized, placebo-controlled study. *Diabetes Obes Metab.*  
17 2007;9:166-74.  
18 110. Garber AJ, Foley JE, Banerji MA, et al. Effects of vildagliptin on glucose control in patients with  
19 type 2 diabetes inadequately controlled with a sulphonylurea. *Diabetes Obes Metab.*  
20 2008;10:1047-56.  
21 111. Yang W, Xing X, Lv X, et al. Vildagliptin added to sulfonylurea improves glycemic control without  
22 hypoglycemia and weight gain in Chinese patients with type 2 diabetes mellitus. *J Diabetes.*  
23 2015;7:174-81.  
24 112. Foley JE, Bunck MC, Moller-Goede DL, et al. Beta cell function following 1 year vildagliptin or  
25 placebo treatment and after 12 week washout in drug-naïve patients with type 2 diabetes and  
26 mild hyperglycaemia: a randomised controlled trial. *Diabetologia.* 2011;54:1985-91.  
27 113. Bunck MC, Poelma M, Eekhoff EM, et al. Effects of vildagliptin on postprandial markers of bone  
28 resorption and calcium homeostasis in recently diagnosed, well-controlled type 2 diabetes  
29 patients. *J Diabetes.* 2012;4:181-5.  
30 114. Pan C, Xing X, Han P, et al. Efficacy and tolerability of vildagliptin as add-on therapy to  
31 metformin in Chinese patients with type 2 diabetes mellitus. *Diabetes Obes Metab.*  
32 2012;14:737-44.  
33 115. Lukashevich V, Del Prato S, Araga M, Kothny W. Efficacy and safety of vildagliptin in patients  
34 with type 2 diabetes mellitus inadequately controlled with dual combination of metformin and  
35 sulphonylurea. *Diabetes Obes Metab.* 2014;16:403-9.  
36 116. Macauley M, Hollingsworth KG, Smith FE, et al. Effect of vildagliptin on hepatic steatosis. *J Clin*  
37 *Endocrinol Metab.* 2015;100:1578-85.  
38 117. Ahren B, Gomis R, Standl E, Mills D, Schweizer A. Twelve- and 52-week efficacy of the dipeptidyl  
39 peptidase IV inhibitor LAF237 in metformin-treated patients with type 2 diabetes. *Diabetes Care.*  
40 2004;27:2874-80.  
41 118. Ahren B, Pacini G, Foley JE, Schweizer A. Improved meal-related beta-cell function and insulin  
42 sensitivity by the dipeptidyl peptidase-IV inhibitor vildagliptin in metformin-treated patients  
43 with type 2 diabetes over 1 year. *Diabetes Care.* 2005;28:1936-40.  
44 119. Goodman M, Thurston H, Penman J. Efficacy and tolerability of vildagliptin in patients with type  
45 2 diabetes inadequately controlled with metformin monotherapy. *Horm Metab Res.*  
46 2009;41:368-73.  
47 120. Ito M, Abe M, Okada K, et al. The dipeptidyl peptidase-4 (DPP-4) inhibitor vildagliptin improves  
48 glycemic control in type 2 diabetic patients undergoing hemodialysis. *Endocr J.* 2011;58:979-87.  
49  
50  
51  
52  
53  
54  
55  
56  
57  
58  
59  
60



121. Derosa G, Ragonesi PD, Carbone A, et al. Vildagliptin added to metformin on beta-cell function after a euglycemic hyperinsulinemic and hyperglycemic clamp in type 2 diabetes patients. *Diabetes Technol Ther*. 2012;14:475-84.
122. Derosa G, Ragonesi PD, Carbone A, et al. Vildagliptin action on some adipocytokine levels in type 2 diabetic patients: a 12-month, placebo-controlled study. *Expert Opin Pharmacother*. 2012;13:2581-91.
123. Derosa G, Ragonesi PD, Carbone A, et al. Evaluation of the positive effects on insulin-resistance and beta-cell measurements of vildagliptin in addition to metformin in type 2 diabetic patients. *Pharmacol Res*. 2013;73:20-6.
124. Yang SJ, Min KW, Gupta SK, et al. A multicentre, multinational, randomized, placebo-controlled, double-blind, phase 3 trial to evaluate the efficacy and safety of gemigliptin (LC15-0444) in patients with type 2 diabetes. *Diabetes Obes Metab*. 2013;15:410-6.
125. Efficacy and Safety of MP-513 in Combination With Metformin in Patients With Type 2 Diabetes. NCT00971243. ClinicalTrials.gov; 2014.  
<https://clinicaltrials.gov/ct2/show/NCT00971243?term=NCT00971243&rank=1>. Accessed July 06, 2015.
126. Yang HK, Min KW, Park SW, et al. A randomized, placebo-controlled, double-blind, phase 3 trial to evaluate the efficacy and safety of anagliptin in drug-naïve patients with type 2 diabetes. *Endocr J*. 2015;62:449-62.
127. Thrasher J, Daniels K, Patel S, Whetteckey J. Black/African American patients with type 2 diabetes mellitus: study design and baseline patient characteristics from a randomized clinical trial of linagliptin. *Expert Opin Pharmacother*. 2012;13:2443-52.
128. Omarigliptin (MK-3102) Clinical Trial - Placebo- and Sitagliptin-Controlled Monotherapy Study in Japanese Patients With Type 2 Diabetes Mellitus (MK-3102-020). NCT01703221. ClinicalTrials.gov; 2016. <https://clinicaltrials.gov/ct2/show/NCT01703221>. Accessed August 24, 2016.
129. Zografou I, Sampanis C, Gkaliagkousi E, et al. Effect of vildagliptin on hsCRP and arterial stiffness in patients with type 2 diabetes mellitus. *Hormones (Athens)*. 2015;14:118-25.
130. Chien MN, Lee CC, Chen WC, Liu SC, Leung CH, Wang CH. Effect of Sitagliptin as Add-on Therapy in Elderly Type 2 Diabetes Patients With Inadequate Glycemic Control in Taiwan. *Int J Gerontology*. 2011;5:103-6.
131. Weinstock RS, Guerci B, Umpierrez G, Nauck MA, Skrivaneck Z, Milicevic Z. Safety and efficacy of once-weekly dulaglutide versus sitagliptin after 2 years in metformin-treated patients with type 2 diabetes (AWARD-5): a randomized, phase III study. *Diabetes Obes Metab*. 2015;17:849-58.
132. Matthaie S, Catrinou D, Celinski A, et al. Randomized, Double-Blind Trial of Triple Therapy With Saxagliptin Add-on to Dapagliflozin Plus Metformin in Patients With Type 2 Diabetes. *Diabetes Care*. 2015;38:2018-24.
133. Linagliptin as Add on Therapy to Empagliflozin 10 mg or 25 mg With Background Metformin in Patient With Type 2 Diabetes. NCT01778049. ClinicalTrials.gov; 2016.  
<https://clinicaltrials.gov/ct2/show/NCT01778049>. Accessed August 24, 2016.
134. Wu W, Li Y, Chen X, et al. Effect of Linagliptin on Glycemic Control in Chinese Patients with Newly-Diagnosed, Drug-Naïve Type 2 Diabetes Mellitus: A Randomized Controlled Trial. *Med Sci Monit*. 2015;21:2678-84.
135. Mita T, Katakami N, Shiraiwa T, et al. Sitagliptin Attenuates the Progression of Carotid Intima-Media Thickening in Insulin-Treated Patients With Type 2 Diabetes: The Sitagliptin Preventive Study of Intima-Media Thickness Evaluation (SPIKE): A Randomized Controlled Trial. *Diabetes Care*. 2016;39:455-64.

1  
2  
3  
4 136. Mita T, Katakami N, Yoshii H, et al. Alogliptin, a Dipeptidyl Peptidase 4 Inhibitor, Prevents the  
5 Progression of Carotid Atherosclerosis in Patients With Type 2 Diabetes: The Study of Preventive  
6 Effects of Alogliptin on Diabetic Atherosclerosis (SPEAD-A). *Diabetes Care*. 2016;39:139-48.  
7 137. Jin SM, Park SW, Yoon KH, et al. Anagliptin and sitagliptin as add-ons to metformin for patients  
8 with type 2 diabetes: a 24-week, multicentre, randomized, double-blind, active-controlled,  
9 phase III clinical trial with a 28-week extension. *Diabetes Obes Metab*. 2015;17:511-5.  
10 138. Phase 3 Study to Compare the Efficacy and Safety of Gemigliptin and Vildagliptin as Add-on  
11 Therapy to Metformin in People With Type 2 Diabetes Inadequately Controlled With Metformin.  
12 NCT02343926. ClinicalTrials.gov; 2016. <https://clinicaltrials.gov/ct2/show/NCT02343926>.  
13 Accessed August 24, 2016.  
14 139. Study to Evaluate the Safety and Efficacy of the Addition of Omarigliptin (MK-3102) Compared  
15 With the Addition of Sitagliptin in Participants With Type 2 Diabetes Mellitus With Inadequate  
16 Glycemic Control on Metformin (MK-3102-026). NCT01841697. ClinicalTrials.gov; 2016.  
17 <https://clinicaltrials.gov/ct2/show/NCT01841697>. Accessed August 24, 2016.  
18 140. A Phase IIIb Study to Evaluate the Safety and Efficacy of Gemigliptin in Type 2 Diabetes Mellitus  
19 Patients With Moderate or Severe Renal Impairment(GUARD Study) (GUARD). NCT01968044.  
20 ClinicalTrials.gov; 2016. <https://clinicaltrials.gov/ct2/show/NCT01968044>. Accessed August 24,  
21 2016.  
22 141. Tang YZ, Wang G, Jiang ZH, et al. Efficacy and safety of vildagliptin, sitagliptin, and linagliptin as  
23 add-on therapy in Chinese patients with T2DM inadequately controlled with dual combination  
24 of insulin and traditional oral hypoglycemic agent. *Diabetol Metab Syndr*. 2015;7:91.  
25 142. Galstyan KO, Nedosugova LV, Petunina NA, et al. First Russian DPP-4 inhibitor Gosogliptin  
26 comparing to Vildagliptin in type 2 diabetes mellitus patients. *Diabetes Mellitus*. 2015;19:89-96.  
27 143. Guerci B, Monnier L, Serusclat P, et al. Continuous glucose profiles with vildagliptin versus  
28 sitagliptin in add-on to metformin: results from the randomized Optima study. *Diabetes Metab*.  
29 2012;38:359-66.  
30 144. Li CJ, Liu XJ, Bai L, et al. Efficacy and safety of vildagliptin, Saxagliptin or Sitagliptin as add-on  
31 therapy in Chinese patients with type 2 diabetes inadequately controlled with dual combination  
32 of traditional oral hypoglycemic agents. *Diabetol Metab Syndr*. 2014;6:69.  
33 145. Kothny W, Lukashevich V, Foley JE, Rendell MS, Schweizer A. Comparison of vildagliptin and  
34 sitagliptin in patients with type 2 diabetes and severe renal impairment: a randomised clinical  
35 trial. *Diabetologia*. 2015;58:2020-6.  
36 146. Abbas AS, Dehbi HM, Ray KK. Cardiovascular and non-cardiovascular safety of dipeptidyl  
37 peptidase-4 inhibition: a meta-analysis of randomized controlled cardiovascular outcome trials.  
38 *Diabetes Obes Metab*. 2016;18:295-9.  
39 147. Kongwatcharapong J, Dilokthornsakul P, Nathisuwan S, Phrommintikul A, Chaiyakunapruk N.  
40 Effect of dipeptidyl peptidase-4 inhibitors on heart failure: A meta-analysis of randomized  
41 clinical trials. *Int J Cardiol*. 2016;211:88-95.  
42 148. Li L, Li S, Deng K, et al. Dipeptidyl peptidase-4 inhibitors and risk of heart failure in type 2  
43 diabetes: systematic review and meta-analysis of randomised and observational studies. *BMJ*.  
44 2016;352:i610.  
45 149. Monami M, Dicembrini I, Mannucci E. Dipeptidyl peptidase-4 inhibitors and heart failure: a  
46 meta-analysis of randomized clinical trials. *Nutr Metab Cardiovasc Dis*. 2014;24:689-97.  
47 150. Savarese G, Perrone-Filardi P, D'Amore C, et al. Cardiovascular effects of dipeptidyl peptidase-4  
48 inhibitors in diabetic patients: A meta-analysis. *Int J Cardiol*. 2015;181:239-44.  
49  
50  
51  
52  
53  
54  
55  
56  
57  
58  
59  
60

151. Wu S, Hopper I, Skiba M, Krum H. Dipeptidyl peptidase-4 inhibitors and cardiovascular outcomes: meta-analysis of randomized clinical trials with 55,141 participants. *Cardiovasc Ther.* 2014;32:147-58.
152. Dormandy JA, Charbonnel B, Eckland DJ, et al. Secondary prevention of macrovascular events in patients with type 2 diabetes in the PROactive Study (PROspective pioglitAzone Clinical Trial In macroVascular Events): a randomised controlled trial. *Lancet.* 2005;366:1279-89.
153. Nissen SE, Wolski K. Effect of rosiglitazone on the risk of myocardial infarction and death from cardiovascular causes. *N Engl J Med.* 2007;356:2457-71.
154. Friedrich JO, Beyene J, Adhikari NK. Rosiglitazone: can meta-analysis accurately estimate excess cardiovascular risk given the available data? Re-analysis of randomized trials using various methodologic approaches. *BMC Res Notes.* 2009;2:5.
155. Chen Y, Ning G, Wang C, et al. Efficacy and safety of linagliptin monotherapy in Asian patients with inadequately controlled type 2 diabetes mellitus: A multinational, 24-week, randomized, clinical trial. *J Diabetes Investig.* 2015;6:692-8.
156. Moses RG, Round E, Shentu Y, et al. A randomized clinical trial evaluating the safety and efficacy of sitagliptin added to the combination of sulfonylurea and metformin in patients with type 2 diabetes mellitus and inadequate glycemic control. *J Diabetes.* 2016;8:701-11.
157. Ji L, Han P, Wang X, et al. A Randomized Clinical Trial of the Safety and Efficacy of Sitagliptin and Metformin Co-administered to Chinese Patients with Type 2 Diabetes Mellitus. *J Diabetes Investig.* 2016.
158. Friedrich JO, Adhikari NK, Beyene J. Inclusion of zero total event trials in meta-analyses maintains analytic consistency and incorporates all available data. *BMC Med Res Methodol.* 2007;7:5.
159. Sweeting MJ, Sutton AJ, Lambert PC. What to add to nothing? Use and avoidance of continuity corrections in meta-analysis of sparse data. *Stat Med.* 2004;23:1351-75.
160. Kuss O. Statistical methods for meta-analyses including information from studies without any events-add nothing to nothing and succeed nevertheless. *Stat Med.* 2015;34:1097-116.
161. DerSimonian R, Laird N. Meta-analysis in clinical trials. *Control Clin Trials.* 1986;7:177-88.
162. Higgins JP, Thompson SG, Deeks JJ, Altman DG. Measuring inconsistency in meta-analyses. *BMJ.* 2003;327:557-60.
163. Egger M, Davey Smith G, Schneider M, Minder C. Bias in meta-analysis detected by a simple, graphical test. *BMJ.* 1997;315:629-34.
164. Begg CB, Mazumdar M. Operating characteristics of a rank correlation test for publication bias. *Biometrics.* 1994;50:1088-101.

1  
2  
3  
4  
5  
6  
7  
8  
9  
10  
11  
12  
13  
14  
15  
16  
17  
18  
19  
20  
21  
22  
23  
24  
25  
26  
27  
28  
29  
30  
31  
32  
33  
34  
35  
36  
37  
38  
39  
40  
41  
42  
43  
44  
45  
46  
47  
48  
49

**Table 1:** Description of Included Randomized Controlled Trials

| First Author<br><br>Year of Publication                         | Trial<br>Registration<br>Number | Inclusion Criteria                                |                     | Trial<br>Dura-<br>tion<br>(wks) | Baseline Patient Characteristics |                      |           |                     |                                 |             |                    |                           | Patients w/<br>Heart Failure<br>(n/N) |              |
|-----------------------------------------------------------------|---------------------------------|---------------------------------------------------|---------------------|---------------------------------|----------------------------------|----------------------|-----------|---------------------|---------------------------------|-------------|--------------------|---------------------------|---------------------------------------|--------------|
|                                                                 |                                 | Other<br>Anti-<br>hypergly-<br>-cemic<br>agent(s) | A1C<br>range<br>(%) |                                 | Prim.<br>Out-<br>come            | Mean<br>Age<br>(yrs) | %<br>Male | %<br>Cauca-<br>sian | BMI<br>(kg/<br>m <sup>2</sup> ) | DM<br>(yrs) | Mean<br>A1C<br>(%) | On<br>Insu-<br>lin<br>(%) | DPP4<br>Inhi-<br>bitor                | Pla-<br>cebo |
| Trials with Primary Cardiovascular Outcomes                     |                                 |                                                   |                     |                                 |                                  |                      |           |                     |                                 |             |                    |                           |                                       |              |
| Scirica 2013, 2014 (SAVOR-TIMI 53) <sup>4,5</sup> (saxagliptin) | NCT01107886                     | --                                                | 6.5-12              | 110 (med)                       | MACE                             | 65                   | 67%       | 75%                 | 31                              | 10.3 (med)  | 8.0                | 41%                       | 289/8280                              | 228/8212     |
| White 2013 (EXAMINE) <sup>6,7</sup> (alogliptin)                | NCT00968708                     | --                                                | 6.5-11 (7-11)       | 76 (med)                        | MACE                             | 61 (med)             | 68%       | 73%                 | 29 (med)                        | 7.2 (med)   | 8.0                | 30%                       | 106/2701                              | 89/2679      |
| Green 2015 (TECOS) <sup>8,25</sup> (sitagliptin)                | NCT00790205                     | --                                                | 6.5-8               | 156 (med)                       | MACE                             | 66                   | 71%       | 68%                 | 30                              | 9.4 (med)   | 7.2                | 23%                       | 228/7332                              | 229/7339     |
| Trials with Primary Metabolic Outcomes                          |                                 |                                                   |                     |                                 |                                  |                      |           |                     |                                 |             |                    |                           |                                       |              |
| Alogliptin                                                      |                                 |                                                   |                     |                                 |                                  |                      |           |                     |                                 |             |                    |                           |                                       |              |

|                                  |                   |             |        |     |                   |    |     |                   |     |      |       |      |            |           |
|----------------------------------|-------------------|-------------|--------|-----|-------------------|----|-----|-------------------|-----|------|-------|------|------------|-----------|
| Nauck 2009 <sup>26</sup>         | NCT00286442       | Met         | 7-10   | 26  | A1C               | 55 | 50% | 77%               | 32  | 6    | 7.9   | 0%   | 1/<br>423  | 0/<br>104 |
| DeFronzo<br>2008 <sup>27</sup>   | NCT00286455       | --          | 7-10   | 26  | A1C               | 53 | 53% | 67%               | n/r | n/r  | 7.9   | 0%   | 0/<br>264  | 0/<br>64  |
| Pratley 2009 <sup>29</sup>       | NCT00286468       | Sulf        | 7-10   | 26  | A1C               | 57 | 52% | 71%               | 30  | 7.7  | 8.1   | 0%   | 1/<br>401  | 0/<br>99  |
| Pratley2009 <sup>30</sup>        | NCT00286494       | Pio         | 7-10   | 26  | A1C               | 55 | 58% | 74%               | 33  | 7.6  | 8.0   | 0%   | 2/<br>397  | 0/<br>97  |
| Rosenstock<br>2009 <sup>31</sup> | NCT00286429       | Ins         | ≥8     | 26  | A1C               | 55 | 41% | 65%               | 32  | 12.6 | 9.3   | 100% | 0/<br>261  | 0/<br>129 |
| Rosenstock<br>2010 <sup>28</sup> | NCT00395512       | Pio 30      | 7.5-11 | 26  | A1C               | 53 | 49% | 80%               | 31  | 3.2  | 8.8   | 0%   | 0/<br>327  | 0/<br>163 |
| Pratley 2014 <sup>32</sup>       | NCT01023581       | ±Met        | 7.5-10 | 26  | A1C               | 54 | 54% | 68%               | 31  | 4    | 8-8.5 | 0%   | 0/<br>442  | 0/<br>326 |
| DeFronzo<br>2012 <sup>33</sup>   | NCT00328627       | Met<br>±Pio | 7.5-10 | 26  | A1C               | 54 | 45% | 71%               | 3   | 6.2  | 8.5   | 0%   | 0/<br>1037 | 2/<br>516 |
| Mita 2016 <sup>136</sup>         | UMIN0000053<br>11 | +Var        | 7-9.3  | 104 | Intimal<br>thick- | 65 | 58% | 0%(Jap-<br>anese) | 25  | 8.6  | 7.3   | 0%   | 0/<br>161  | 0/<br>161 |

|                                                        |                                 |                |                 |    |      |    |     |               |    |       |     |     |           |           |
|--------------------------------------------------------|---------------------------------|----------------|-----------------|----|------|----|-----|---------------|----|-------|-----|-----|-----------|-----------|
|                                                        |                                 |                |                 |    | ness |    |     |               |    |       |     |     |           |           |
| <b>Linagliptin</b>                                     |                                 |                |                 |    |      |    |     |               |    |       |     |     |           |           |
| Gomis<br>2011 <sup>34</sup>                            | NCT00641043                     | ±Met           | 7.5-10<br>(11)  | 24 | A1C  | 55 | 54% | 67%           | 29 | n/r   | 8.6 | 0%  | 0/<br>259 | 0/<br>130 |
| Haak<br>2012 <sup>35</sup> /Haak<br>2013 <sup>36</sup> | NCT00798161<br>/NCT0091577<br>2 | ±Met           | 7.5-10<br>(11)  | 24 | A1C  | 55 | 54% | 67%           | 29 | 2.5   | 8.7 | 0%  | 2/<br>428 | 0/<br>363 |
| Owens<br>2011 <sup>37</sup>                            | NCT00602472                     | +Met &<br>Sulf | 7-10            | 24 | A1C  | 58 | 47% | 47%           | 28 | >5    | 8.1 | 0%  | 0/<br>792 | 0/<br>263 |
| Taskinen<br>2011 <sup>38</sup>                         | NCT00601250                     | +Met           | 7-10            | 24 | A1C  | 57 | 54% | 76%           | 30 | 5     | 8.1 | 0%  | 0/<br>523 | 0/<br>177 |
| Thrasher<br>2014 <sup>39,127</sup>                     | NCT01194830                     | --             | 7.5-11          | 24 | A1C  | 54 | 54% | 0%<br>(Black) | 33 | 5-6   | 8.7 | 0%  | 0/<br>106 | 0/<br>120 |
| Barnett<br>2013 <sup>40</sup>                          | NCT01084005                     | --             | ≥7 (age<br>≥70) | 24 | A1C  | 75 | 68% | 97%           | 30 | 10-12 | 7.8 | 21% | 0/<br>162 | 0/<br>79  |
| Bajaj 2014 <sup>41</sup>                               | NCT00996658                     | +Met<br>&Pio   | 7.5-10          | 24 | A1C  | 54 | 49% | 27%           | 28 | 1-2   | 8.4 | 0%  | 0/<br>183 | 0/<br>89  |
| Del Prato                                              | NCT00621140                     | --             | 7-10            | 24 | A1C  | 56 | 48% | 54%           | 29 | n/r   | 8   | 0%  | 0/<br>0/  | 0/<br>0/  |

|                                                              |             |       |               |    |     |    |     |                  |     |     |     |      |           |           |
|--------------------------------------------------------------|-------------|-------|---------------|----|-----|----|-----|------------------|-----|-----|-----|------|-----------|-----------|
| 2011 <sup>42</sup>                                           |             |       |               |    |     |    |     |                  |     |     |     |      | 336       | 167       |
| McGill<br>2013 <sup>43</sup>                                 | NCT00800683 | --    | 7-10<br>(CRI) | 52 | A1C | 64 | 60% | 74%              | 32  | >5  | 8.2 | 82%  | 2/68      | 1/65      |
| Yki-Jarvinen<br>2013 <sup>44</sup>                           | NCT00954447 | --    | 7-10          | 52 | A1C | 60 | 52% | 80%              | 31  | >5  | 8.3 | 100% | 3/<br>631 | 2/<br>630 |
| ClinicalTrials.<br>gov <sup>48</sup>                         | NCT01183013 | +Pio  | 7-10.5        | 84 | A1C | 57 | 53% | n/r              | n/r | n/r | 8.1 | 0%   | 0/<br>392 | 1/<br>409 |
| Chen 2015 <sup>155</sup>                                     | NCT01214239 | --    | 7-10          | 24 | A1C | 54 | 59% | 0%<br>(Asian)    | 25  | n/r | 8.0 | 0%   | 0/<br>200 | 0/<br>99  |
| ClinicalTrials.<br>gov <sup>50</sup>                         | NCT01215097 | +Met  | 7-10          | 24 | A1C | 56 | 50% | 0%<br>(Asian)    | 26  | n/r | 8.0 | 0%   | 0/<br>205 | 0/<br>100 |
| DeFronzo<br>2015 <sup>45</sup> /Lewi<br>n 2015 <sup>46</sup> | NCT01422876 | ±Met  | 7-10.5        | 24 | A1C | 55 | 54% | 74%              | 31  | ~5  | 8.0 | 0%   | 0/<br>545 | 0/<br>551 |
| ClinicalTrials.<br>gov <sup>47</sup>                         | NCT01708902 | +Met  | 7.5-11        | 24 | A1C | 51 | 62% | n/r              | n/r | n/r | n/r | n/r  | 0/<br>294 | 0/<br>289 |
| Wu 2015 <sup>134</sup>                                       | n/r         | --    | 7-10          | 24 | A1C | 52 | 59% | 0%(Chi-<br>nese) | 24  | 0   | 8.0 | 0%   | 0/33      | 0/22      |
| ClinicalTrials.                                              | NCT01778049 | +Empa | 7-10.5        | 24 | A1C | 57 | 57% | n/r              | n/r | n/r | n/r | n/r  | 0/<br>0/  | 0/<br>0/  |

1  
2  
3  
4  
5  
6  
7  
8  
9  
10  
11  
12  
13  
14  
15  
16  
17  
18  
19  
20  
21  
22  
23  
24  
25  
26  
27  
28  
29  
30  
31  
32  
33  
34  
35  
36  
37  
38  
39  
40  
41  
42  
43  
44  
45  
46  
47  
48  
49

|                                                                     |             |              |               |                            |     |    |     |      |    |      |     |      |           |           |
|---------------------------------------------------------------------|-------------|--------------|---------------|----------------------------|-----|----|-----|------|----|------|-----|------|-----------|-----------|
| gov <sup>133</sup>                                                  |             | &Met         |               |                            |     |    |     |      |    |      |     |      | 238       | 240       |
| <b>Saxagliptin</b>                                                  |             |              |               |                            |     |    |     |      |    |      |     |      |           |           |
| Pfützner<br>2011 <sup>51</sup> /<br>Jadzinsky<br>2009 <sup>52</sup> | NCT00327015 | +Met         | 8-12          | 76                         | A1C | 52 | 49% | 76%  | 30 | 1.7  | 9.4 | 0%   | 1/<br>643 | 2/<br>328 |
| Barnett<br>2013 <sup>53</sup>                                       | NCT00757588 | +Ins<br>±Met | 7.5-11        | 52                         | A1C | 57 | 41% | 78%  | 32 | 12   | 8.7 | 100% | 2/<br>304 | 0/<br>151 |
| Chacra<br>2011 <sup>54</sup>                                        | NCT00313313 | +Sulf        | 7.5-10        | 76                         | A1C | 55 | 45% | 59%  | 29 | 7    | 8.4 | 0%   | 1/<br>501 | 0/<br>267 |
| DeFronzo<br>2009 <sup>55</sup> /<br>Rosentock<br>2013 <sup>56</sup> | NCT00121667 | +Met         | 7-10          | 24<br>(208<br>for<br>mort) | A1C | 55 | 51% | 82%  | 31 | 6.5  | 8.0 | 0%   | 3/<br>564 | 2/<br>179 |
| Frederich<br>2012 <sup>57</sup>                                     | NCT00316082 | --           | 7-10          | 24                         | A1C | 55 | 46% | 70%  | 31 | 1.7  | 8.0 | 0%   | 0/<br>291 | 0/<br>74  |
| Hollander<br>2011 <sup>58</sup>                                     | NCT00295633 | +TZD         | 7-10.5        | 76                         | A1C | 54 | 50% | 55%  | 30 | 5.2  | 8.3 | 0%   | 0/<br>381 | 1/<br>184 |
| Nowicki<br>2011 <sup>59</sup>                                       | NCT00614939 | +var         | 7-11<br>(CRI) | 52                         | A1C | 67 | 43% | 100% | 31 | 16.6 | 8.3 | 75%  | 1/85      | 2/85      |



|                                                                        |             |               |          |                            |     |    |     |               |    |     |     |    |           |           |
|------------------------------------------------------------------------|-------------|---------------|----------|----------------------------|-----|----|-----|---------------|----|-----|-----|----|-----------|-----------|
| Pan 2012 <sup>60</sup>                                                 | NCT00698932 | --            | 7-10     | 24                         | A1C | 51 | 55% | 0%<br>(Asian) | 26 | 1   | 8.1 | 0% | 0/<br>284 | 0/<br>284 |
| Rosenstock<br>2009 <sup>61</sup> /Rose<br>nstock<br>2013 <sup>56</sup> | NCT00121641 | --            | 7-10     | 24<br>(208<br>for<br>mort) | A1C | 53 | 51% | 85%           | 32 | 2.6 | 7.9 | 0% | 1/<br>306 | 0/<br>95  |
| Moses<br>2014 <sup>62</sup>                                            | NCT01128153 | +Met<br>&Sulf | 7-10     | 24                         | A1C | 57 | 60% | 45%           | 29 | n/r | 8.3 | 0% | 0/<br>129 | 0/<br>128 |
| Rosenstock<br>2015 <sup>63</sup>                                       | NCT01606007 | +Met<br>&dap  | 8-12     | 24                         | A1C | 54 | 49% | 70%           | 32 | 7.3 | 8.9 | 0% | 0/<br>179 | 0/<br>179 |
| Matthaei<br>2015 <sup>132</sup>                                        | NCT01619059 | +Met&<br>dap  | 8-11.5   | 24                         | A1C | 55 | 47% | 88%           | 31 | 7.7 | 7.9 | 0% | 1/<br>153 | 2/<br>162 |
| <b>Sitagliptin</b>                                                     |             |               |          |                            |     |    |     |               |    |     |     |    |           |           |
| Charbonnel<br>2006 <sup>64</sup>                                       | NCT00086515 | +Met          | 7-10     | 24                         | A1C | 55 | 57% | 64%           | 31 | 4.6 | 8.0 | 0% | 1/<br>464 | 0/<br>237 |
| Hermansen<br>2007 <sup>65</sup>                                        | NCT00106704 | +Sulf<br>±Met | 7.5-10.5 | 24                         | A1C | 56 | 53% | 63%           | 31 | 8.8 | 8.3 | 0% | 1/<br>222 | 0/<br>219 |
| Henry 2014 <sup>66</sup>                                               | NCT00722371 | +Pio          | 7.5-11   | 54                         | A1C | 52 | 56% | 67%           | 31 | 3.9 | 8.9 | 0% | 2/<br>691 | 0/<br>693 |

|                                                                                |                                 |              |                      |     |     |    |     |               |     |     |     |      |           |           |
|--------------------------------------------------------------------------------|---------------------------------|--------------|----------------------|-----|-----|----|-----|---------------|-----|-----|-----|------|-----------|-----------|
| Raz 2008 <sup>67</sup>                                                         | NCT00337610                     | +Met         | 8-11                 | 30  | A1C | 55 | 46% | 44%           | 30  | 7.9 | 9.2 | 0%   | 0/96      | 0/94      |
| Vilsbøll<br>2011 <sup>68</sup>                                                 | NCT00395343                     | +Ins<br>±Met | 7.5-11               | 24  | A1C | 58 | 51% | 70%           | 31  | 12  | 8.7 | 100% | 0/<br>322 | 2/<br>319 |
| Williams-<br>Herman<br>2010 <sup>69</sup> /<br>Goldstein<br>2007 <sup>70</sup> | NCT00103857                     | ±Met         | 7.5-11               | 104 | A1C | 53 | 49% | 52%           | 32  | 4.5 | 8.8 | 0%   | 1/<br>372 | 0/<br>364 |
| Yoon<br>2012 <sup>71</sup> /Yoon<br>2011 <sup>72</sup>                         | NCT00397631<br>/<br>NCT01028391 | +Pio         | 8-12                 | 54  | A1C | 51 | 54% | 52%           | 30  | 2.3 | 9.5 | 0%   | 0/<br>261 | 0/<br>259 |
| ClinicalTrials.<br>gov <sup>73</sup>                                           | NCT00918879                     | --           | 7-10                 | 24  | A1C | 49 | 56% | 0%<br>(India) | n/r | n/r | n/r | 0%   | 0/<br>107 | 0/<br>106 |
| Yang 2011 <sup>74</sup>                                                        | NCT00661362                     | +Met         | 7-10                 | 24  | A1C | 54 | 48% | 0%<br>(Asian) | 26  | 5.1 | 7.8 | 0%   | 0/<br>283 | 0/<br>287 |
| ClinicalTrials.<br>gov <sup>75</sup>                                           | NCT00875394                     | +Met         | 6.5-11               | 24  | A1C | 55 | 26% | n/r           | 29  | 8.4 | 8.5 | 0%   | 0/36      | 0/9       |
| Barzilai<br>2011 <sup>76</sup>                                                 | NCT00305604                     | --           | 7-10<br>(age<br>≥65) | 24  | A1C | 72 | 47% | 79%           | 31  | 7.1 | 7.8 | 0%   | 0/<br>102 | 0/<br>104 |
| Yang 2012 <sup>77</sup>                                                        | NCT00813995                     | +Met         | 7.5-11               | 24  | A1C | 55 | 51% | 0%(Chi-       | 25  | 6.9 | 8.5 | 0%   | 0/        | 0/        |

|                                            |             |               |          |    |                         |    |     |       |     |     |     |    |           |           |
|--------------------------------------------|-------------|---------------|----------|----|-------------------------|----|-----|-------|-----|-----|-----|----|-----------|-----------|
|                                            |             |               |          |    |                         |    |     | nese) |     |     |     |    | 197       | 198       |
| Rosenstock<br>2006 <sup>78</sup>           | NCT00086502 | +Pio          | 7-10     | 24 | A1C                     | 56 | 56% | 73%   | 31  | 6.1 | 8.0 | 0% | 0/<br>175 | 0/<br>178 |
| Aschner<br>2006 <sup>79</sup>              | NCT00087516 | --            | 7-10     | 24 | A1C                     | 54 | 52% | 51%   | 30  | 4.4 | 8.0 | 0% | 0/<br>488 | 0/<br>253 |
| Fonseca<br>2013 <sup>80</sup>              | NCT00885352 | +Met<br>+Pio  | 7.5-11   | 26 | A1C                     | 56 | 62% | 50%   | 30  | 9.8 | 8.7 | 0% | 0/<br>157 | 0/<br>156 |
| Olansky<br>2011 <sup>81</sup>              | NCT00482729 | +Met          | ≥7.5     | 44 | A1C                     | 50 | 57% | 80%   | 33  | 3.4 | 9.9 | 0% | 1/<br>625 | 0/<br>621 |
| ClinicalTrials.<br>gov <sup>82</sup>       | NCT00420511 | +Met          | 6/6.5-9  | 44 | β-cell<br>func-<br>tion | 61 | 67% | 62%   | 33  | 3.0 | 6.1 | 0% | 0/10      | 0/11      |
| Dobs 2013 <sup>83</sup>                    | NCT00350779 | +Met<br>&Rosi | 7.5-11   | 54 | A1C                     | 55 | 58% | 51%   | 30  | 9.3 | 8.8 | 0% | 0/<br>170 | 0/<br>92  |
| Moses<br>2016 <sup>156</sup>               | NCT01076075 | +Met<br>&Sulf | 7.5-10.5 | 24 | A1C                     | 55 | 46% | n/r   | n/r | n/r | 8.4 | 0% | 0/<br>210 | 0/<br>212 |
| Lavalle-<br>González<br>2013 <sup>85</sup> | NCT01106677 | --            | 7-10.5   | 26 | A1C                     | 55 | 48% | 72%   | 32  | 6.8 | 7.9 | 0% | 1/<br>366 | 0/<br>183 |

|                                      |                                 |               |                  |     |     |    |     |                  |     |      |     |      |           |           |
|--------------------------------------|---------------------------------|---------------|------------------|-----|-----|----|-----|------------------|-----|------|-----|------|-----------|-----------|
| Mathieu<br>2015 <sup>86</sup>        | NCT01462266                     | +Glar<br>±Met | 7.5-11           | 24  | A1C | 59 | 48% | 70%              | 32  | 13.5 | 8.7 | 100% | 0/<br>329 | 0/<br>329 |
| Roden<br>2013 <sup>87</sup>          | NCT01177813<br>/<br>NCT01289990 | --            | 7-10             | 76  | A1C | 55 | 59% | 34%              | 28  | <5   | 7.9 | 0%   | 1/<br>223 | 0/<br>223 |
| ClinicalTrials.<br>gov <sup>88</sup> | NCT01177384                     | +Acar         | n/r              | 24  | A1C | 57 | 51% | n/r              | n/r | n/r  | 8.1 | 0%   | 0/<br>191 | 0/<br>189 |
| Skrivanek<br>2014 <sup>89</sup>      | NCT00734474                     | +Met          | 7-9.5            | 26  | A1C | 54 | 49% | 51%              | 31  | 7    | 8.1 | 0%   | 0/<br>355 | 0/<br>177 |
| ClinicalTrials.<br>gov <sup>90</sup> | NCT00838903                     | +Met          | n/r              | 156 | A1C | 55 | 47% | 72%              | n/r | n/r  | n/r | n/r  | 1/<br>302 | 0/<br>101 |
| Ji 2016 <sup>157</sup>               | NCT01076088                     | ±Met          | 7(.5)-<br>10(11) | 24  | A1C | 53 | 61% | 0%(Chi-<br>nese) | n/r | n/r  | 8.7 | 0%   | 0/<br>367 | 0/<br>376 |
| ClinicalTrials.<br>gov <sup>92</sup> | NCT01519674                     | +Met<br>&Ins  | 7-10             | 24  | A1C | 56 | 52% | 49%              | 29  | 9.1  | 8.4 | 100% | 0/<br>383 | 0/<br>192 |
| ClinicalTrials.<br>gov <sup>93</sup> | NCT01590771                     | +Sulf<br>±Met | 7.5-11           | 24  | A1C | 57 | 50% | n/r              | n/r | n/r  | 8.6 | 0%   | 0/<br>248 | 0/<br>249 |
| ClinicalTrials.                      | NCT01590797                     | +Ins          | 7.5-11           | 24  | A1C | 58 | 53% | 0%(Chi-          | n/r | n/r  | n/r | 100% | 0/<br>248 | 0/<br>249 |

|                                  |                                   |      |              |     |                                                    |     |     |                   |    |      |     |      |           |           |
|----------------------------------|-----------------------------------|------|--------------|-----|----------------------------------------------------|-----|-----|-------------------|----|------|-----|------|-----------|-----------|
| gov <sup>94</sup>                |                                   | ±Met |              |     |                                                    |     |     | nese)             |    |      |     |      | 234       | 233       |
| ClinicalTrials.gov <sup>95</sup> | NCT01652729                       | +Met | 7.1-11       | 28  | A1C                                                | 54  | 56% | 81%               | 32 | 8.2  | 8.5 | 0%   | 0/<br>122 | 0/<br>61  |
| Ishikawa 2014 <sup>96</sup>      | UMIN0000064<br>32                 | --   | <6.5         | 52  | Caro-<br>tid<br>artery<br>intima<br>thick-<br>ness | 71  | 85% | 0%(Jap-<br>anese) | 25 | n/r  | 5.6 | 0%   | 0/37      | 0/39      |
|                                  | *UMIN Clinical<br>Trials Registry |      |              |     |                                                    |     |     |                   |    |      |     |      |           |           |
| Derosa 2012 <sup>97-99</sup>     | n/r                               | +Met | >8.0         | 52  | A1C                                                | 55  | 48% | 100%              | 29 | 0.5  | 8.1 | 0%   | 0/91      | 0/87      |
| Derosa 2014 <sup>100</sup>       | n/r                               | +Var | >7.0         | 104 | A1C                                                | n/r | 49% | 100%              | 29 | n/r  | 8.1 | 0%   | 0/<br>102 | 0/<br>103 |
| Chien 2011 <sup>130</sup>        | n/r                               | +Var | ≥7.0         | 24  | A1C                                                | 73  | 58% | 0%(Chi-<br>nese)  | 26 | 13.6 | 9.7 | 0%   | 0/49      | 0/48      |
| Weinstock 2015 <sup>131</sup>    | NCT00734474                       | +Met | 7/8-<br>9.5% | 26  | A1C                                                | 54  | 49% | 51%               | 31 | 7.0  | 8.1 | 0%   | 0/<br>315 | 0/<br>177 |
| Mita 2016 <sup>135</sup>         | UMIN0000073<br>96                 | +Var | ≥6.6         | 104 | Intimal<br>thick-<br>ness                          | 64  | 60% | 0%(Jap-<br>anese) | 25 | 17.3 | 8.1 | 100% | 0/<br>137 | 0/<br>137 |

1  
2  
3  
4  
5  
6  
7  
8  
9  
10  
11  
12  
13  
14  
15  
16  
17  
18  
19  
20  
21  
22  
23  
24  
25  
26  
27  
28  
29  
30  
31  
32  
33  
34  
35  
36  
37  
38  
39  
40  
41  
42  
43  
44  
45  
46  
47  
48  
49

|                                   |                                                              |      |                    |     |      |    |     |              |     |      |     |      |            |            |
|-----------------------------------|--------------------------------------------------------------|------|--------------------|-----|------|----|-----|--------------|-----|------|-----|------|------------|------------|
| ClinicalTrials.gov <sup>128</sup> | NCT01703221                                                  | --   | n/r                | 24  | A1C  | 60 | 69% | 0%(Japanese) | n/r | n/r  | n/r | 0%   | 0/<br>164* | 0/<br>82   |
| <b>Vildagliptin</b>               |                                                              |      |                    |     |      |    |     |              |     |      |     |      |            |            |
| Bosi 2007 <sup>101</sup>          | NCT00099892                                                  | +Met | 7.5-11             | 24  | A1C  | 54 | 57% | 74%          | 33  | 6.3  | 8.4 | 0%   | 0/<br>360  | 0/<br>181  |
| Bosi 2009 <sup>102</sup>          | NCT00382096<br>/<br>NCT00468039                              | +Met | 7.5-11             | 24  | A1C  | 53 | 58% | 73%          | 31  | 4.1  | 8.7 | 0%   | 0/<br>292  | 0/<br>292  |
| Fonseca 2007 <sup>103</sup>       | NCT00099931                                                  | +Ins | 7.5-11             | 24  | A1C  | 59 | 51% | 71%          | 33  | 14.7 | 8.4 | 100% | 0/<br>144  | 0/<br>152  |
| VIVIDD 2014 <sup>104</sup>        | NCT00894868                                                  | --   | 6.5-10<br>(EF <40) | 52  | LVEF | 63 | 77% | n/r          | 29  | n/r  | 7.8 | 34%  | 13/<br>128 | 10/<br>125 |
| Scherbaum 2008 <sup>105,106</sup> | NCT0030028 <sup>10</sup><br>5/<br>NCT00101712 <sup>106</sup> | --   | 6.2-7.5            | 104 | A1C  | 63 | 59% | 99%          | 30  | 2.6  | 6.7 | 0%   | 0/<br>156  | 0/<br>150  |
| Strain 2013 <sup>107</sup>        | NCT01257451                                                  | --   | 7-10<br>(age >70)  | 24  | A1C  | 75 | 45% | 97%          | 30  | 11.4 | 7.9 | 0%   | 1/<br>139  | 1/<br>139  |
| Vollmer 2009 <sup>108</sup>       | NCT00494884                                                  | +Met | 6.5-8              | 24  | A1C  | 61 | 46% | 96%          | n/r | n/r  | 7.2 | 0%   | 0/<br>274  | 0/<br>131  |

|                                                          |                           |               |                 |    |                              |    |     |                  |    |     |     |    |           |           |
|----------------------------------------------------------|---------------------------|---------------|-----------------|----|------------------------------|----|-----|------------------|----|-----|-----|----|-----------|-----------|
| Garber 2007 <sup>109</sup>                               | NCT00099853               | +Pio          | 7.5-11          | 24 | A1C                          | 54 | 43% | 69%              | 32 | 4.7 | 8.7 | 0% | 1/<br>305 | 1/<br>158 |
| Garber 2008 <sup>110</sup>                               | NCT00099944               | +Sulf         | 7.5-11          | 24 | A1C                          | 58 | 59% | 69%              | 31 | 7.1 | 8.5 | 0% | 0/<br>339 | 0/<br>176 |
| Yang 2015 <sup>111</sup>                                 | NCT01357252               | +Sulf         | 7.5-11          | 24 | A1C                          | 59 | 57% | 0%(Chi-<br>nese) | 25 | 6.9 | 8.7 | 0% | 0/<br>143 | 0/<br>136 |
| Foley 2011 <sup>112</sup> /<br>Bunck 2012 <sup>113</sup> | NCT00260156               | --            | ≤7.5            | 52 | β-cell<br>func-<br>tion      | 57 | 59% | 93%              | 30 | 1.0 | 6.0 | 0% | 0/29      | 0/30      |
| Pan 2012 <sup>114</sup>                                  | NCT00822211               | +Met          | 7-10            | 24 | A1C                          | 54 | 47% | 0%(Chi-<br>nese) | 25 | 5   | 8.1 | 0% | 0/<br>294 | 0/<br>144 |
| Lukashevich 2014 <sup>115</sup>                          | NCT01233622               | +Met<br>±Sulf | 7.5(8.5)-<br>11 | 24 | A1C                          | 55 | 48% | 23%              | 28 | 7.3 | 8.8 | 0% | 0/<br>157 | 0/<br>160 |
| Macauley 2015 <sup>116</sup>                             | NCT01356381               | +Met          | ≤7.6            | 26 | Liver<br>TG +<br>Ins<br>Sens | 61 | 64% | n/r              | 30 | 1.0 | 6.0 | 0% | 0/20      | 0/19      |
| Ahren 2004 <sup>117</sup> /Ahre                          | Pre-dated<br>registration | +Met          | 7-9.5           | 52 | A1C                          | 57 | 37% | 99%              | 30 | 5.6 | 7.7 | 0% | 0/56      | 0/51      |

1  
2  
3  
4  
5  
6  
7  
8  
9  
10  
11  
12  
13  
14  
15  
16  
17  
18  
19  
20  
21  
22  
23  
24  
25  
26  
27  
28  
29  
30  
31  
32  
33  
34  
35  
36  
37  
38  
39  
40  
41  
42  
43  
44  
45  
46  
47  
48  
49

|                                       |             |      |                |    |                                 |    |     |                    |    |     |     |    |           |           |
|---------------------------------------|-------------|------|----------------|----|---------------------------------|----|-----|--------------------|----|-----|-----|----|-----------|-----------|
| n 2005 <sup>118</sup>                 |             |      |                |    |                                 |    |     |                    |    |     |     |    |           |           |
| Goodman<br>2009 <sup>119</sup>        | n/r         | +Met | 7.5-11         | 24 | A1C                             | 55 | 58% | 66%                | 32 | n/r | 8.6 | 0% | 0/<br>248 | 0/<br>122 |
| Ito 2011 <sup>120</sup>               | n/r         | --   | >7.0<br>(ESRD) | 24 | A1C                             | 67 | 69% | 0%(Jap-<br>anese)  | 23 | n/r | 6.7 | 0% | 0/30      | 0/21      |
| Derosa<br>2012 <sup>121-123</sup>     | n/r         | +Met | 8.1-10.9       | 52 | A1C+<br>β-cell<br>func-<br>tion | 53 | 51% | 100%               | 28 | 0.5 | 8.2 | 0% | 0/84      | 0/83      |
| Zografou<br>2015 <sup>129</sup>       | n/r         | +Met | 7-9            | 26 | Arter.<br>stiff-<br>ness        | 54 | 59% | n/r                | 32 | n/r | 8.1 | 0% | 0/32      | 0/32      |
| <b>Gemigliptin</b>                    |             |      |                |    |                                 |    |     |                    |    |     |     |    |           |           |
| Yang 2013 <sup>124</sup>              | NCT01601990 | --   | 7-11           | 24 | A1C                             | 53 | 58% | 0%(Ind/<br>Korean) | 26 | 3   | 8.3 | 0% | 0/87      | 0/87      |
| <b>Teneligliptin</b>                  |             |      |                |    |                                 |    |     |                    |    |     |     |    |           |           |
| ClinicalTrials.<br>gov <sup>125</sup> | NCT00971243 | +Met | 7-10           | 24 | A1C                             | 58 | 56% |                    |    |     |     | 0% | 0/<br>359 | 0/<br>88  |
| <b>Anagliptin</b>                     |             |      |                |    |                                 |    |     |                    |    |     |     |    |           |           |
| Yang 2015 <sup>126</sup>              | NCT01529528 | --   | 6.5-10         | 24 | A1C                             | 56 | 54% | 0%<br>(Korean      | 25 | 3.6 | 7.1 | 0% | 0/        | 1/        |



|  |  |  |  |  |  |  |  |   |  |  |  |  |    |    |
|--|--|--|--|--|--|--|--|---|--|--|--|--|----|----|
|  |  |  |  |  |  |  |  | ) |  |  |  |  | 68 | 40 |
|--|--|--|--|--|--|--|--|---|--|--|--|--|----|----|

Abbreviations: acar, acarbose; BMI, body mass index; dap, dapagliflozin; DPP-4, dipeptidyl peptidase-4 ; EF, left ventricular ejection fraction; empa, empagliflozin; glar, glargine; Ind, Indian; ins, insulin; LVEF, left ventricular ejection fraction; MACE, major adverse cardiovascular events; med, median; met, metformin; n/N, number of patients with heart failure/total number of patients; n/r, not reported; pio, pioglitazone; rosi, rosiglitazone; sulf, sulfonylurea; TZD, thiazolidinedione; var, various hypoglycemic agents; wks, weeks; yrs, years.

\*Randomized patients to three groups comparing both sitagliptin and omarigliptin to placebo. 0/166 heart failure events in the omarigliptin group.

Confidential

**Table 2:** Trial and baseline patient comorbidities and medications for RCTs with primary cardiovascular outcomes\*

| Trial Name                         | SAVOR-TIMI 53                                                                  | EXAMINE                            | TECOS                                                  |
|------------------------------------|--------------------------------------------------------------------------------|------------------------------------|--------------------------------------------------------|
| <b>Trial Characteristics</b>       |                                                                                |                                    |                                                        |
| DPP-4 Inhibitor                    | Saxagliptin                                                                    | Alogliptin                         | Sitagliptin                                            |
| Number of Patients                 | 16492                                                                          | 5380                               | 14724                                                  |
| Enrolment period                   | Oct 2009 – Mar 2013                                                            | May 2010 – Dec 2011                | Dec 2008 – Jul 2012                                    |
| Median Follow Up (y)               | 2.1                                                                            | 1.5                                | 3.0                                                    |
| Main Inclusion Criteria            |                                                                                |                                    |                                                        |
| -A1C                               | 6.5-12.0%                                                                      | 6.5-11.0%<br>(7-11% if on insulin) | 6.5-8.0%                                               |
| -Clinical                          | Established CV disease or age>55/60 (male/female) and one other CV risk factor | ACS in previous 15-90d             | Established CV disease and ≥50 years old               |
| <b>Patient Comorbidities</b>       |                                                                                |                                    |                                                        |
| Hypertension                       | 81%                                                                            | 83%                                | 86%                                                    |
| Dyslipidemia                       | 71%                                                                            | n/r                                | 77%                                                    |
| Current Smoker                     | 13%                                                                            | 14%                                | 11%                                                    |
| Prior MI                           | 38%                                                                            | 88%**                              | 43%                                                    |
| Prior PCI                          | 27%                                                                            | 63%**                              | 39%                                                    |
| Prior CABG                         | 24%                                                                            | 13%**                              | 25%                                                    |
| Heart Failure                      | 13%                                                                            | 28%                                | 18%                                                    |
| Atrial Fibrillation                | 7%                                                                             | n/r                                | 8%<br>(incl AFlutter)                                  |
| Stroke                             | 13%                                                                            | 7%                                 | 17% (+4% TIA)                                          |
| Peripheral Arterial Disease        | 12%                                                                            | 10%                                | 17%                                                    |
| eGFR (mL/min/1.73 m <sup>2</sup> ) | 73 (excluded dialysis)                                                         | 71 (excluded dialysis)             | 75 (excluded <30)                                      |
| <b>Medications</b>                 |                                                                                |                                    |                                                        |
| ASA                                | 75%                                                                            | 91%                                | 79%                                                    |
| Any Anti-platelet                  | 81%                                                                            | n/r (80% thienopyridine)           | n/r (22% clopidogrel/ticlopidine, 7% vit K antagonist) |
| Statin                             | 78%                                                                            | 90%                                | 80%                                                    |
| ACE Inhibitor/ARB                  | 79% (total)                                                                    | 82% (total)                        | 79%                                                    |
| Beta-Blocker                       | 61%                                                                            | 82%                                | 64%                                                    |
| Other antihypertensive agents      | 41%                                                                            | 22% CCB<br>37% diuretic            | 34% CCB<br>41% diuretic                                |

\*The three trials used virtually identical HF definitions: patients were required to be admitted to hospital or have an emergency department visit of more than 12h with clinical manifestations of heart failure, defined as at least one of new or worsening dyspnea, orthopnea, paroxysmal nocturnal dyspnea,

peripheral edema, bibasilar rales on pulmonary examination, jugular venous distention, new third heart sound, or radiographic evidence of heart failure; and receive at least one of intravenous treatment with a diuretic, inotrope, or vasodilator therapy, ultrafiltration or dialysis, or mechanical or surgical intervention (including heart transplant) specifically directed as treatment for their heart failure. The other smaller RCTs did not provide definitions, or specify whether the patients with HF required hospitalization or whether this outcome was subject to blinded adjudication.

\*\* includes index event prior to enrolment

Abbreviations: ACE, angiotensin converting enzyme; ACS, acute coronary syndrome; ARB, angiotensin receptor blocker; AFlutter, atrial flutter; ASA, aspirin; CABG, coronary artery bypass grafting; CAD, coronary artery disease; CCB, calcium channel blocker; CV, cardiovascular; eGFR, estimated glomerular filtration rate; kg, kilogram (body weight); min, minute; MI, myocardial infarction; mL, milliliter; N, number of patients; no., number; n/r, not reported; PCI, percutaneous coronary intervention; TIA, transient ischemic attack; vit, vitamin; y, years.

1  
2  
3  
4  
5  
6  
7  
8  
9  
10  
11  
12  
13  
14  
15  
16  
17  
18  
19  
20  
21  
22  
23  
24  
25  
26  
27  
28  
29  
30  
31  
32  
33  
34  
35  
36  
37  
38  
39  
40  
41  
42  
43  
44  
45  
46  
47  
48  
49

**Table 3:** Study Risk of Bias

| First Author<br>Year of Publication                       | Trial Registration<br>Number<br>(ClinTrials.gov) | Total<br>Number<br>of<br>Patients<br>Random<br>ized | Number<br>of<br>Centres | Trial<br>Dura-<br>tion<br>(wks) | Blin-<br>ded<br>** | AC  | ITT | No<br>Early<br>Stop-<br>ping<br>for<br>Bene-<br>fit | <5% Loss<br>to Follow<br>Up |
|-----------------------------------------------------------|--------------------------------------------------|-----------------------------------------------------|-------------------------|---------------------------------|--------------------|-----|-----|-----------------------------------------------------|-----------------------------|
| Primary Cardiovascular Outcomes                           |                                                  |                                                     |                         |                                 |                    |     |     |                                                     |                             |
| Scirica 2013 (SAVOR-TIMI 53) <sup>4,5</sup> (saxagliptin) | NCT01107886                                      | 16492                                               | 788                     | 110*                            | Yes                | Yes | Yes | Yes                                                 | Yes (0.9%)                  |
| White 2013 (EXAMINE) <sup>6,7</sup> (alogliptin)          | NCT00968708                                      | 5380                                                | 898                     | 76*                             | Yes                | Yes | Yes | Yes                                                 | Yes (0.9%)                  |
| Green 2015 (TECOS) <sup>8,25</sup> (sitagliptin)          | NCT00790205                                      | 14724                                               | 673                     | 156*                            | Yes                | Yes | Yes | Yes                                                 | Yes (0.4%)                  |
|                                                           |                                                  |                                                     |                         | * median                        |                    |     |     |                                                     |                             |
| Alogliptin                                                |                                                  |                                                     |                         |                                 |                    |     |     |                                                     |                             |
| DeFronzo 2008 <sup>27</sup>                               | NCT00286455                                      | 329                                                 | 67                      | 26                              | Yes                | Yes | Yes | Yes                                                 | Yes (0.3%)                  |
| Nauck 2009 <sup>26</sup>                                  | NCT00286442                                      | 527                                                 | 115                     | 26                              | Yes                | Yes | Yes | Yes                                                 | Yes (0%)                    |
| Pratley 2009 <sup>29</sup>                                | NCT00286468                                      | 500                                                 | 124                     | 26                              | Yes                | Yes | Yes | Yes                                                 | Yes (0%)                    |
| Pratley 2009 <sup>30</sup>                                | NCT00286494                                      | 493                                                 | 125                     | 26                              | Yes                | Yes | Yes | Yes                                                 | Yes (0%)                    |
| Rosenstock 2009 <sup>31</sup>                             | NCT00286429                                      | 390                                                 | 110                     | 26                              | Yes                | Yes | Yes | Yes                                                 | Yes (0%)                    |

|                                                  |                             |         |         |       |     |     |     |     |                  |
|--------------------------------------------------|-----------------------------|---------|---------|-------|-----|-----|-----|-----|------------------|
| Rosenstock 2010 <sup>28</sup>                    | NCT00395512                 | 490     | 161     | 26    | Yes | Yes | Yes | Yes | Yes (0%)         |
| Pratley 2014 <sup>32</sup>                       | NCT01023581                 | 784     | 198     | 26    | Yes | Yes | Yes | Yes | Yes (2.0%)       |
| DeFronzo 2012 <sup>33</sup>                      | NCT00328627                 | 1554    | 327     | 26    | Yes | Yes | Yes | Yes | Yes (0.1%)       |
| Mita 2016 <sup>136</sup>                         | UMIN000005311               | 341     | 11      | 104   | No  | Yes | Yes | Yes | No (5.6%)        |
|                                                  |                             |         |         |       |     |     |     |     |                  |
| <b>Linagliptin</b>                               |                             |         |         |       |     |     |     |     |                  |
| Gomis 2011 <sup>34</sup>                         | NCT00641043                 | 389     | 43      | 24    | Yes | Yes | Yes | Yes | Yes (0%)         |
| Haak 2012 <sup>35</sup> /Haak 2013 <sup>36</sup> | NCT00798161/<br>NCT00915772 | 791/567 | 133/112 | 24/54 | Yes | Yes | Yes | Yes | Yes<br>(0%/0.2%) |
| Owens 2011 <sup>37</sup>                         | NCT00602472                 | 1058    | 100     | 24    | Yes | Yes | Yes | Yes | Yes (0.3%)       |
| Taskinen 2011 <sup>38</sup>                      | NCT00601250                 | 701     | 82      | 24    | Yes | Yes | Yes | Yes | Yes (0.1%)       |
| Thrasher 2014 <sup>39,127</sup>                  | NCT01194830                 | 226     | 93      | 24    | Yes | Yes | Yes | Yes | Yes (0.0%)       |
| Barnett 2013 <sup>40</sup>                       | NCT01084005                 | 241     | 33      | 24    | Yes | Yes | Yes | Yes | Yes (0.0%)       |
| Bajaj 2014 <sup>41</sup>                         | NCT00996658                 | 272     | 52      | 24    | Yes | Yes | Yes | Yes | Yes (0.0%)       |
| Del Prato 2011 <sup>42</sup>                     | NCT00621140                 | 503     | 66      | 24    | Yes | Yes | Yes | Yes | Yes (0.0%)       |
| McGill 2013 <sup>43</sup>                        | NCT00800683                 | 133     | 53      | 52    | Yes | Yes | Yes | Yes | Yes (0.0%)       |
| Yki-Jarvinen 2013 <sup>44</sup>                  | NCT00954447                 | 1261    | 167     | 52    | Yes | Yes | Yes | Yes | Yes (0.0%)       |

1  
2  
3  
4  
5  
6  
7  
8  
9  
10  
11  
12  
13  
14  
15  
16  
17  
18  
19  
20  
21  
22  
23  
24  
25  
26  
27  
28  
29  
30  
31  
32  
33  
34  
35  
36  
37  
38  
39  
40  
41  
42  
43  
44  
45  
46  
47  
48  
49

|                                                            |             |      |     |                                      |     |     |     |     |            |
|------------------------------------------------------------|-------------|------|-----|--------------------------------------|-----|-----|-----|-----|------------|
| ClinicalTrials.gov <sup>48</sup>                           | NCT01183013 | 936  | 132 | 84                                   | Yes | Yes | Yes | Yes | Yes (0.0%) |
| Chen 2015 <sup>155</sup>                                   | NCT01214239 | 300  | 19  | 24                                   | Yes | Yes | Yes | Yes | Yes (0.3%) |
| ClinicalTrials.gov <sup>50</sup>                           | NCT01215097 | 306  | 19  | 24                                   | Yes | Yes | Yes | Yes | Yes (0.3%) |
| DeFronzo 2015 <sup>45</sup> / Lewin 2015 <sup>46</sup>     | NCT01422876 | 1404 | 211 | 24                                   | Yes | Yes | Yes | Yes | Yes (3.0%) |
| ClinicalTrials.gov <sup>47</sup>                           | NCT01708902 | 730  | 56  | 24                                   | Yes | Yes | Yes | Yes | Yes (0.0%) |
| Wu 2015 <sup>134</sup>                                     | n/r         | 57   | 1   | 24                                   | Yes | Yes | Yes | Yes | Yes (3.5%) |
| ClinicalTrials.gov <sup>133</sup>                          | NCT01778049 | 708  | 114 | 24                                   | Yes | Yes | Yes | Yes | n/r        |
|                                                            |             |      |     |                                      |     |     |     |     |            |
| <b>Saxagliptin</b>                                         |             |      |     |                                      |     |     |     |     |            |
| Pfützner 2011 <sup>51</sup> /Jadzinsky 2009 <sup>52</sup>  | NCT00327015 | 1306 | 211 | 76                                   | Yes | Yes | Yes | Yes | Yes (0.2%) |
| Barnett 2013 <sup>53</sup>                                 | NCT00757588 | 457  | 80  | 52                                   | Yes | Yes | Yes | Yes | Yes (0.4%) |
| Chacra 2011 <sup>54</sup>                                  | NCT00313313 | 768  | 115 | 76                                   | Yes | Yes | Yes | Yes | Yes (0.0%) |
| DeFronzo 2009 <sup>55</sup> /Rosenstock 2013 <sup>56</sup> | NCT00121667 | 743  | 154 | 24<br>(208<br>for<br>mor-<br>tality) | Yes | Yes | Yes | Yes | Yes (0.0%) |
| Frederich 2012 <sup>57</sup>                               | NCT00316082 | 366  | 72  | 24                                   | Yes | Yes | Yes | Yes | Yes (0.3%) |
| Hollander 2011 <sup>58</sup>                               | NCT00295633 | 565  | 133 | 76                                   | Yes | Yes | Yes | Yes | Yes (0.0%) |

|                                                                  |              |      |         |                                      |     |     |     |     |            |
|------------------------------------------------------------------|--------------|------|---------|--------------------------------------|-----|-----|-----|-----|------------|
| Nowicki 2011 <sup>59</sup>                                       | NCT00614939  | 170  | 75      | 52                                   | Yes | Yes | Yes | Yes | Yes (0.0%) |
| Pan 2012 <sup>60</sup>                                           | NCT00698932  | 568  | 40      | 24                                   | Yes | Yes | Yes | Yes | Yes (0.0%) |
| Rosenstock 2009 <sup>61</sup> /Rosenstock 2013 <sup>56</sup>     | NCT00121641  | 401  | 135     | 24<br>(208<br>for<br>mor-<br>tality) | Yes | Yes | Yes | Yes | Yes (0.0%) |
| Moses 2014 <sup>62</sup>                                         | NCT01128153  | 257  | 35      | 24                                   | Yes | Yes | Yes | Yes | Yes (0.0%) |
| Rosenstock 2015 <sup>63</sup>                                    | NCT01606007  | 534  | 139     | 24                                   | Yes | Yes | Yes | Yes | Yes (0.0%) |
| Matthaei 2015 <sup>132</sup>                                     | NCT01619059  | 315  | 84      | 24                                   | Yes | Yes | Yes | Yes | Yes (0.0%) |
|                                                                  |              |      |         |                                      |     |     |     |     |            |
| <b>Sitagliptin</b>                                               |              |      |         |                                      |     |     |     |     |            |
| Charbonnel 2006 <sup>64</sup>                                    | NCT00086515  | 701  | 100     | 24                                   | Yes | Yes | Yes | Yes | Yes (0.0%) |
| Hermansen 2007 <sup>65</sup>                                     | NCT00106704  | 441  | 74      | 24                                   | Yes | Yes | Yes | Yes | Yes (0.0%) |
| Henry 2014 <sup>66</sup>                                         | NCT00722371  | 1615 | 256     | 54                                   | Yes | Yes | Yes | Yes | Yes (0.0%) |
| Raz 2008 <sup>67</sup>                                           | NCT00337610  | 190  | 24      | 30                                   | Yes | Yes | Yes | Yes | Yes (0.0%) |
| Vilsbøll 2011 <sup>68</sup>                                      | NCT00395343  | 641  | 100     | 24                                   | Yes | Yes | Yes | Yes | Yes (0.0%) |
| Williams-Herman 2010 <sup>69</sup> /Goldstein 2007 <sup>70</sup> | NCT00103857  | 1091 | 140/117 | 104                                  | Yes | Yes | Yes | Yes | Yes (0.0%) |
| Yoon 2012 <sup>71</sup> /Yoon 2011 <sup>72</sup>                 | NCT00397631/ | 520  | 60/28   | 54                                   | Yes | Yes | Yes | Yes | Yes (0.0%) |

1  
2  
3  
4  
5  
6  
7  
8  
9  
10  
11  
12  
13  
14  
15  
16  
17  
18  
19  
20  
21  
22  
23  
24  
25  
26  
27  
28  
29  
30  
31  
32  
33  
34  
35  
36  
37  
38  
39  
40  
41  
42  
43  
44  
45  
46  
47  
48  
49

|                                     |                             |      |       |    |     |     |     |     |            |
|-------------------------------------|-----------------------------|------|-------|----|-----|-----|-----|-----|------------|
|                                     | NCT01028391                 |      |       |    |     |     |     |     |            |
| ClinicalTrials.gov <sup>73</sup>    | NCT00918879                 | 213  | 9     | 24 | Yes | Yes | Yes | Yes | Yes (0.0%) |
| Yang 2011 <sup>74</sup>             | NCT00661362                 | 570  | 40    | 24 | Yes | Yes | Yes | Yes | Yes (0.0%) |
| ClinicalTrials.gov <sup>75</sup>    | NCT00875394                 | 68   | 1     | 24 | No  | n/r | n/r | n/r | n/r        |
| Barzilai 2011 <sup>76</sup>         | NCT00305604                 | 206  | 52    | 24 | Yes | Yes | Yes | Yes | Yes (0.0%) |
| Yang 2012 <sup>77</sup>             | NCT00813995                 | 395  | 17    | 24 | Yes | Yes | Yes | Yes | Yes (0.0%) |
| Rosenstock 2006 <sup>78</sup>       | NCT00086502                 | 353  | 71    | 24 | Yes | Yes | Yes | Yes | Yes (0.0%) |
| Aschner 2006 <sup>79</sup>          | NCT00087516                 | 741  | 111   | 24 | Yes | Yes | Yes | Yes | Yes (0.0%) |
| Fonseca 2013 <sup>80</sup>          | NCT00885352                 | 313  | 58    | 26 | Yes | Yes | Yes | Yes | Yes (0.0%) |
| Olansky 2011 <sup>81</sup>          | NCT00482729                 | 1250 | 209   | 44 | Yes | Yes | Yes | Yes | Yes (0.3%) |
| ClinicalTrials.gov <sup>82</sup>    | NCT00420511                 | 21   | 1     | 44 | Yes | Yes | Yes | Yes | Yes (0.0%) |
| Dobs 2013 <sup>83</sup>             | NCT00350779                 | 278  | 41    | 54 | Yes | Yes | Yes | Yes | No (5.8%)  |
| Moses 2016 <sup>156</sup>           | NCT01076075                 | 427  | Multi | 24 | Yes | Yes | Yes | Yes | Yes (1.2%) |
| Lavalle-González 2013 <sup>85</sup> | NCT01106677                 | 1284 | 169   | 26 | Yes | Yes | Yes | Yes | Yes (0.0%) |
| Mathieu 2015 <sup>86</sup>          | NCT01462266                 | 660  | Multi | 24 | Yes | Yes | Yes | Yes | Yes (0.3%) |
| Roden 2013 <sup>87</sup>            | NCT01177813/<br>NCT01289990 | 899  | 124   | 76 | Yes | Yes | Yes | Yes | Yes (1.1%) |



|                                   |                               |      |       |     |     |       |     |       |            |
|-----------------------------------|-------------------------------|------|-------|-----|-----|-------|-----|-------|------------|
| ClinicalTrials.gov <sup>88</sup>  | NCT01177384                   | 381  | Multi | 24  | Yes | Yes   | Yes | Yes   | Yes (0.0%) |
| Skrivanek 2014 <sup>89</sup>      | NCT00734474                   | 1202 | 99    | 26  | Yes | Yes   | Yes | Yes   | Yes (0.0%) |
| ClinicalTrials.gov <sup>90</sup>  | NCT00838903                   | 1049 | 386   | 156 | Yes | Yes   | Yes | Yes   | Yes (3.5%) |
| Ji 2016 <sup>157</sup>            | NCT01076088                   | 744  | Multi | 24  | Yes | Yes   | Yes | Yes   | Yes (0.1%) |
| ClinicalTrials.gov <sup>92</sup>  | NCT01519674                   | 582  | 60    | 24  | Yes | Yes   | Yes | Yes   | Yes (1.2%) |
| ClinicalTrials.gov <sup>93</sup>  | NCT01590771                   | 498  | Multi | 24  | Yes | Yes   | Yes | Yes   | Yes (0.2%) |
| ClinicalTrials.gov <sup>94</sup>  | NCT01590797                   | 467  | 28    | 24  | Yes | Yes   | Yes | Yes   | Yes (0.0%) |
| ClinicalTrials.gov <sup>95</sup>  | NCT01652729                   | 366  | 60    | 28  | Yes | Yes   | Yes | Yes   | Yes (0.3%) |
| Ishikawa 2014 <sup>96</sup>       | UMIN000006432                 | 80   | 1     | 52  | No  | Uncl. | Yes | Yes   | Yes (3.8%) |
|                                   | UMIN Clinical Trials Registry |      |       |     |     |       |     |       |            |
| Derosa 2012 <sup>97-99</sup>      | n/r                           | 178  | 1     | 52  | Yes | Yes   | Yes | Yes   | n/r        |
| Derosa 2014 <sup>100</sup>        | n/r                           | 205  | Multi | 104 | Yes | Yes   | Yes | Yes   | n/r        |
| Chien 2011 <sup>130</sup>         | n/r                           | 97   | 1     | 24  | No  | Uncl. | Yes | Uncl. | Yes (0.0%) |
| Weinstock 2015 <sup>131</sup>     | NCT00734474                   | 1098 | 111   | 26  | Yes | Yes   | Yes | Yes   | Yes (0.0%) |
| Mita 2016 <sup>135</sup>          | UMIN000007396                 | 282  | 12    | 104 | No  | Yes   | Yes | Yes   | Yes (2.8%) |
| ClinicalTrials.gov <sup>128</sup> | NCT01703221                   | 414  | Multi | 24  | Yes | Yes   | Yes | Yes   | Yes (0.5%) |

1  
2  
3  
4  
5  
6  
7  
8  
9  
10  
11  
12  
13  
14  
15  
16  
17  
18  
19  
20  
21  
22  
23  
24  
25  
26  
27  
28  
29  
30  
31  
32  
33  
34  
35  
36  
37  
38  
39  
40  
41  
42  
43  
44  
45  
46  
47  
48  
49

|                                                      |                                                            |      |      |            |     |     |     |     |                    |
|------------------------------------------------------|------------------------------------------------------------|------|------|------------|-----|-----|-----|-----|--------------------|
|                                                      |                                                            |      |      |            |     |     |     |     |                    |
| <b>Vildagliptin</b>                                  |                                                            |      |      |            |     |     |     |     |                    |
| Bosi 2007 <sup>101</sup>                             | NCT00099892                                                | 544  | 106  | 24         | Yes | Yes | Yes | Yes | Yes (0.6%)         |
| Bosi 2009 <sup>102</sup>                             | NCT00382096/<br>NCT00468039                                | 1179 | >250 | 24         | Yes | Yes | Yes | Yes | Yes (0.8%)         |
| Fonseca 2007 <sup>103</sup>                          | NCT00099931                                                | 296  | 68   | 24         | Yes | Yes | Yes | Yes | Yes (0.0%)         |
| VIVID 2014 <sup>104</sup>                            | NCT00894868                                                | 254  | 94   | 52         | Yes | Yes | Yes | Yes | Yes (0.4%)         |
| Scherbaum 2008 <sup>105,106</sup>                    | NCT00300287 <sup>105</sup> /<br>NCT00101712 <sup>106</sup> | 306  | 69   | 52/<br>104 | Yes | Yes | Yes | Yes | Yes/No<br>(0%/57%) |
| Strain 2013 <sup>107</sup>                           | NCT01257451                                                | 278  | 45   | 24         | Yes | Yes | Yes | Yes | Yes (0.0%)         |
| Vollmer 2009 <sup>108</sup>                          | NCT00494884                                                | 405  | 94   | 24         | Yes | Yes | Yes | Yes | Yes (0.0%)         |
| Garber 2007 <sup>109</sup>                           | NCT00099853                                                | 463  | 123  | 24         | Yes | Yes | Yes | Yes | Yes (0.0%)         |
| Garber 2008 <sup>110</sup>                           | NCT00099944                                                | 515  | 114  | 24         | Yes | Yes | Yes | Yes | Yes (0.0%)         |
| Yang 2015 <sup>111</sup>                             | NCT01357252                                                | 279  | 18   | 24         | Yes | Yes | Yes | Yes | Yes (0.0%)         |
| Foley 2011 <sup>112</sup> /Bunck 2012 <sup>113</sup> | NCT00260156                                                | 59   | 1    | 52         | Yes | Yes | Yes | Yes | Yes (0.0%)         |
| Pan 2012 <sup>114</sup>                              | NCT00822211                                                | 438  | 17   | 24         | Yes | Yes | Yes | Yes | Yes (0.0%)         |
| Lukashevich 2014 <sup>115</sup>                      | NCT01233622                                                | 318  | 55   | 24         | Yes | Yes | Yes | Yes | Yes (0.3%)         |

|                                                      |                           |     |    |    |     |       |     |       |               |
|------------------------------------------------------|---------------------------|-----|----|----|-----|-------|-----|-------|---------------|
| Macauley 2015 <sup>116</sup>                         | NCT01356831               | 44  | 1  | 26 | Yes | Yes   | Yes | Yes   | No<br>(11.4%) |
| Ahren 2004 <sup>117</sup> /Ahren 2005 <sup>118</sup> | Pre-dated<br>Registration | 107 | 4  | 52 | Yes | Yes   | Yes | Yes   | Yes (0.0%)    |
| Goodman 2009 <sup>119</sup>                          | n/r                       | 370 | 67 | 24 | Yes | Yes   | Yes | Yes   | Yes (0.0%)    |
| Ito 2011 <sup>120</sup>                              | n/r                       | 60  | 1  | 24 | No  | Yes   | Yes | Yes   | No<br>(11.7%) |
| Derosa 2012 <sup>121-123</sup>                       | n/r                       | 167 | 4  | 52 | Yes | Yes   | Yes | Yes   | Yes (0.0%)    |
| Zografou 2015 <sup>129</sup>                         | n/r                       | 64  | 1  | 26 | No  | Uncl. | Yes | Uncl. | n/r           |
|                                                      |                           |     |    |    |     |       |     |       |               |
| <b>Gemigliptin</b>                                   |                           |     |    |    |     |       |     |       |               |
| Yang 2013 <sup>124</sup>                             | NCT01601990               | 182 | 14 | 24 | Yes | Yes   | Yes | Yes   | Yes (4.2%)    |
|                                                      |                           |     |    |    |     |       |     |       |               |
| <b>Teneligliptin</b>                                 |                           |     |    |    |     |       |     |       |               |
| ClinicalTrials.gov <sup>125</sup>                    | NCT00971243               | 448 | 45 | 24 | Yes | Yes   | Yes | Yes   | Yes (0.2%)    |
|                                                      |                           |     |    |    |     |       |     |       |               |
| <b>Anagliptin</b>                                    |                           |     |    |    |     |       |     |       |               |
| Yang 2015 <sup>126</sup>                             | NCT01529528               | 109 | 25 | 24 | Yes | Yes   | Yes | Yes   | Yes (0.9%)    |

1  
2  
3  
4  
5  
6  
7  
8  
9  
10  
11  
12  
13  
14  
15  
16  
17  
18  
19  
20  
21  
22  
23  
24  
25  
26  
27  
28  
29  
30  
31  
32  
33  
34  
35  
36  
37  
38  
39  
40  
41  
42  
43  
44  
45  
46  
47  
48  
49

\*\* Patient, caregiver, and outcome assessor blinding for HF outcome.

Abbreviations : AC, allocation concealment; ITT, intention-to-treat analysis; multi, multi-center; n/r, not reported; uncl, unclear; wks, weeks.

Confidential

**Table 4:** Comparison of current meta-analysis and previously published meta-analyses

| Previously Published Meta-Analyses | Analysis Included Only RCTs in which randomized groups differ by DPP-4 inhibitor treatment to avoid the confounding effect of other medications | Statistically Compared HF Outcomes Between Different DPP-4 Inhibitors | Additional ≥24 week follow up DPP-4 Inhibitor vs Placebo RCTs/ Enrolled Patients With HF Events Included in the Current Meta-Analysis | Avoidance of Inadvertent Double Counting of Some Included RCTs | Inclusion of all* HF outcomes for EXAMINE Trial <sup>7</sup> | Inclusion of most recently published HF results for VIVIDD Trial <sup>104</sup> | Main Conclusions                                                                                                                                                                                                               |
|------------------------------------|-------------------------------------------------------------------------------------------------------------------------------------------------|-----------------------------------------------------------------------|---------------------------------------------------------------------------------------------------------------------------------------|----------------------------------------------------------------|--------------------------------------------------------------|---------------------------------------------------------------------------------|--------------------------------------------------------------------------------------------------------------------------------------------------------------------------------------------------------------------------------|
| Including TECOS                    |                                                                                                                                                 |                                                                       |                                                                                                                                       |                                                                |                                                              |                                                                                 |                                                                                                                                                                                                                                |
| Current Meta-Analysis              | Yes                                                                                                                                             | Yes                                                                   | (reference )                                                                                                                          | Yes                                                            | Yes                                                          | Yes                                                                             | --13% increase in HF risk only statistically significant (P=0.03) if results of smaller RCTs added to large cardiovascular safety RCTs<br>--differences between agents not statistically significant (interaction P=0.07-0.12) |
| Li 2016 <sup>148</sup>             | No                                                                                                                                              | No                                                                    | 10 RCTs/ 5,541 patients                                                                                                               | Yes                                                            | No                                                           | Yes                                                                             | --12% increase in HF risks¶ (P=0.05) pooling HF hospitalization outcomes from 5 RCTs only; no significant increase in HF for the remaining RCTs vs all comparators                                                             |
| Abbas 2016 <sup>146</sup>          | Yes†                                                                                                                                            | No                                                                    | 29 RCTs/ 18,097 patients†                                                                                                             | Yes                                                            | No                                                           | --‡                                                                             | --non-significant 11% increase in HF risk (P=0.19) pooling only the 3 large cardiovascular safety RCTs but not including                                                                                                       |

|                                       |     |    |                                |                                                                                                    |     |     |                                                                                                                                                                                  |
|---------------------------------------|-----|----|--------------------------------|----------------------------------------------------------------------------------------------------|-----|-----|----------------------------------------------------------------------------------------------------------------------------------------------------------------------------------|
|                                       |     |    |                                |                                                                                                    |     |     | all HF outcomes for EXAMINE                                                                                                                                                      |
| Kongwat-charapong 2016 <sup>147</sup> | No  | No | 4 RCTs/<br>1,639<br>patients   | Yes                                                                                                | Yes | No  | --non-significant 11% increase in HF risk (P=0.06) vs all comparators<br>--highlighted increase in HF for saxagliptin but differences not statistically compared to other agents |
| Pre-TECOS                             |     |    |                                |                                                                                                    |     |     |                                                                                                                                                                                  |
| Monami 2014 <sup>149</sup>            | No  | No | 8 RCTs/<br>17,463<br>patients  | No (double counted NCT01028391 <sup>71</sup> which was an extension of NCT00397631 <sup>72</sup> ) | No  | --† | --19% increase in HF odds (P=0.015) vs all comparators<br>--highlighted increase in HF for saxagliptin but differences not statistically compared to other agents                |
| Wu 2014 <sup>151</sup>                | No§ | No | 15 RCTs/<br>19,339<br>patients | No (double counted two publications for NCT00327015 <sup>51,52</sup> )                             | No  | No  | --16% increase in HF risk (P=0.04) vs all comparators and 17% increase (P=0.03) vs only placebo comparators                                                                      |
| Savarse 2015 <sup>150</sup>           | No  | No | 9 RCTs/<br>18,055<br>patients  | No (double counted NCT00915772 <sup>36</sup> which was an extension of NCT00798161 <sup>35</sup> ) | No  | No  | --16% increase in HF risk (P=0.03) vs all comparators pooling long-term follow up RCTs but no increase pooling short-term follow up RCTs                                         |

\*Some of the previously published meta-analyses<sup>146,148-151</sup> included only HF hospitalizations that were counted in the analysis of the composite endpoint reported in the abstract of the follow-up publication for EXAMINE focusing on HF outcomes,<sup>7</sup> instead of all HF hospitalizations reported in the main body of this publication. Including all HF hospitalization events results in a higher HF hospitalization risk for alogliptin for this RCT (RR 1.18 vs. RR 1.07).

†Abbas 2016<sup>146</sup> only included the three large cardiovascular RCTs (SAVOR-TIMI 53,<sup>4,5</sup> EXAMINE<sup>6,7</sup> and TECOS<sup>8</sup>).

‡VIVID<sup>104</sup> was not included in Monami 2014<sup>149</sup> and Abbas 2016<sup>146</sup>.

§For Wu 2014,<sup>151</sup> comparison to placebo trials was included as a secondary analysis.

¶Li 2016<sup>148</sup> actually reported 13% increase in odds using Peto odds ratios ( $P=0.05$ ) which corresponds to a 12% increase in risk using risk ratios ( $P=0.05$ ).

Confidential

1  
2  
3  
4  
5  
6  
7  
8  
9  
10  
11  
12  
13  
14  
15  
16  
17  
18  
19  
20  
21  
22  
23  
24  
25  
26  
27  
28  
29  
30  
31  
32  
33  
34  
35  
36  
37  
38  
39  
40  
41  
42  
43  
44  
45  
46  
47  
48  
49  
50  
51  
52  
53  
54  
55  
56  
57  
58  
59  
60

**FIGURE LEGENDS**

**Figure 1: Search Strategy and Trial Flow**

Flow chart for the systematic review and meta-analysis showing the number of studies retained and number of studies excluded with reason for exclusion at each stage of the study selection process.

**Figure 2: Forest Plot for Heart Failure: Large vs. Small Trials**

Individual and pooled risk ratios (RR) with 95% confidence intervals (CI) for randomized controlled trials (RCTs) with a primary outcome that included cardiovascular outcomes and reported the number of patients in each treatment group that were hospitalized for HF as an adjudicated primary or secondary outcome, as well as smaller RCTs reporting at least one patient with HF for which outcomes were not necessarily adjudicated and patients not necessarily hospitalized. The pooled RRs with 95% CI were calculated using random-effects models. Weight refers to the contribution of each study to the overall pooled estimate of treatment effect. Each square and horizontal line denotes the point estimate and 95% CI for each trial’s RR. The diamonds signify the pooled RR; the diamond’s centre denotes the point estimate and width denotes the 95% CI.

**Figure 3: Forest Plot for Heart Failure by DPP-4 Inhibitor**

Individual and pooled risk ratios (RR) with 95% confidence intervals (CI) for larger and smaller randomized controlled trials (RCTs) by DPP-4 inhibitor. Interaction p-values comparing RRs between pairs of subgroups of RCTs using different DPP-4 inhibitors were all non-significant. For the most extreme difference between saxagliptin RCTs and sitagliptin RCTs, interaction P=0.13 (interaction P=0.07 comparing RR for only SAVOR-TIMI 53 vs. TECOS). The pooled RRs with 95% CI were calculated using random-effects models. Interaction p-values were calculated using Z tests. Weight refers to the



contribution of each study to the overall pooled estimate of treatment effect. Each square and horizontal line denotes the point estimate and 95% CI for each trial's RR. The diamonds signify the pooled RR; the diamond's centre denotes the point estimate and width denotes the 95% CI.

#### Figure 4: Forest Plot for Heart Failure Requiring Hospitalization by Previous History of Heart Failure

Individual and pooled risk ratios (RR) with 95% confidence intervals (CI) for the outcome of heart failure requiring hospitalization in subgroups of patients with vs without previous heart failure in SAVOR TIMI-53 and EXAMINE, the only RCTs that provided this data. Average rates of HF requiring hospitalization were 9.9%  $([124+107+63+65]/[1056+1049+771+762]=359/3638)$  in patients with vs 1.9%  $([165+121+43+24]/[7224+7163+1930+1917]=353/18234)$  in patients without a prior history of HF. In this analysis, the heterogeneity in the overall analysis ( $I^2=43\%$ ) is reduced ( $I^2=0\%$ ) within each subgroup. The pooled RRs with 95% CI were calculated using random-effects models. Interaction p-values were calculated using Z tests. Weight refers to the contribution of each study to the overall pooled estimate of treatment effect. Each square and horizontal line denotes the point estimate and 95% CI for each trial's RR. The diamonds signify the pooled RR; the diamond's centre denotes the point estimate and width denotes the 95% CI.

1  
2  
3  
4  
5  
6  
7  
8  
9  
10  
11  
12  
13  
14  
15  
16  
17  
18  
19  
20  
21  
22  
23  
24  
25  
26  
27  
28  
29  
30  
31  
32  
33  
34  
35  
36  
37  
38  
39  
40  
41  
42  
43  
44  
45  
46  
47  
48  
49  
50  
51  
52  
53  
54  
55  
56  
57  
58  
59  
60

ONLINE APPENDIX

More Detailed Methods

Data Analysis

Analyses were performed using Review Manager (Cochrane Collaboration, Oxford, UK). Review Manager includes continuity corrections of 0.5 in RCTs to allow inclusion of RCTs with no events in one treatment arm. Traditionally, RCTs with no events in either the intervention or control groups are excluded in binary outcome meta-analysis using RR; however, as a sensitivity analysis, continuity corrections were also used in RCTs with no events in either treatment arm to allow their inclusion as previously described.<sup>158</sup> These latter calculations were carried out using standard equations in Microsoft Excel and continuity corrections based on the reciprocal of the group (i.e., treatment or control) opposite the zero cell as proposed by Sweeting and colleagues<sup>159</sup> rather than 0.5 to minimize bias. (A recently published statistical simulation study suggests other approaches to inclusion of such studies.<sup>160</sup>) Random effects models<sup>161</sup> which incorporate between-trial heterogeneity and give wider and more conservative confidence intervals (CI) when heterogeneity is present were used for all analyses. Statistical heterogeneity among trials was assessed using the  $I^2$  statistic, defined as the percentage of total variability across studies attributable to heterogeneity rather than chance.<sup>162</sup> Relative risks (RR) were used to pool outcomes. Individual trial and summary results are reported with 95% CIs. *A priori*, Z-tests of interaction were used to calculate interaction p-values comparing RRs between the larger trials with cardiovascular primary outcomes to the smaller trials, and between pairs of subgroups of RCTs using different DPP-4 inhibitors to determine whether treatment effects differed between agents; and *post hoc* between subgroups of patients with and without a previous history of HF. To assess for publication bias, a funnel plot comparing effect measure for the primary outcome of HF requiring

hospitalization to study precision was examined for evidence of asymmetry and this was tested statistically using both the Egger<sup>163</sup> regression and Begg and Mazumdar<sup>164</sup> rank correlation tests as implemented in Comprehensive Meta Analysis, Version 3.3.070 (available at [www.Meta-Analysis.com](http://www.Meta-Analysis.com)).

Confidential

Supplementary Results

Visual inspection of the funnel plot showed no evidence of asymmetry (Supplementary Figure 1) and there was no statistical evidence for publication bias ( $P=0.44$  using the Egger regression test and  $P=0.59$  using the Begg and Mazumdar rank correlation test).

ClinicalTrials.gov was also systematically searched using the same search strategy but limited to “Interventional” “Recruiting” ( $n=147$ ) and “Active, not Recruiting” ( $n=35$ ) studies. The search identified three ongoing RCTs with primary cardiovascular outcomes of which one is comparing a DPP-4 inhibitor to active control (CAROLINA, linagliptin vs. glimepiride,  $n=6115$ , estimated completion March 2019; ClinicalTrials.gov, NCT01243424), and two that are comparing DPP-4 inhibitors to placebo: 1) CARMELINA (linagliptin vs. placebo,  $n=8,300$ , targeted completion January 2018; ClinicalTrials.gov, NCT01897532) and 2) MK-3102-018 (omarigliptin vs. placebo,  $n=4,202$ , stopped in May 2016 but results currently unpublished; ClinicalTrials.gov, NCT01703208). Assuming baseline HF rates requiring hospitalization in the control group similar to the average of the large RCTs of 3.1% (2.8% for SAVOR-TIMI 53, 3.3% for EXAMINE, 3.1 % for TECOS), then an average RR of as little as 1.03 for both CARMELINA and MK-3102-018 would make the relative risk for HF requiring hospitalization statistically significant pooling only data from the large RCTs with primary cardiovascular outcomes (Supplementary Figure 2A, which assumes  $RR=1.03$  for both CARMELINA and MK-3102-018). These hypothetical results are similar even if one uses baseline HF rates requiring hospitalization half or double the average rate of 3.1% as long as the RR of the two ongoing RCTs are similar. Alternatively, if the RRs are different, for example if the smaller RCT (MK-3102-018) has a RR of 0.9, then the larger RCT (CARMELINA) would have to have a RR at least as high as EXAMINE ( $RR=1.18$ ), for the pooled random-effects RR for HF requiring hospitalization of all five cardiovascular safety RCTs to be statistically significant (Supplementary Figure 2B, which assumes RR 0.90 for MK-3102-018 and RR 1.18 for CARMELINA). (This is due to the effects of

heterogeneity: similar trial results for the ongoing RCTs lower overall heterogeneity and narrow confidence intervals when pooling the results of all five RCTs, while non-similar trial results increase heterogeneity leading to wider confidence intervals.) In any case, these calculations illustrate that the results from the two ongoing DPP-4 inhibitor vs. placebo cardiovascular-safety RCTs will be important as they could have an impact on the pooled risk estimates for HF among the cardiovascular safety RCTs.

Confidential

**Supplementary Table 1: Search Strategies**

**I) Medline Search Strategy:**

Database: Ovid MEDLINE(R) <1946 to August Week 2 2016>, Ovid MEDLINE(R) In-Process & Other Non-Indexed Citations <August 19, 2016>

Search Strategy:

- 1 Dipeptidyl-Peptidase 4 Inhibitors.mp. or exp Dipeptidyl-Peptidase IV Inhibitors/ (3124)
- 2 sitagliptin.mp. (1572)
- 3 saxagliptin.mp. (451)
- 4 vildagliptin.mp. (757)
- 5 linagliptin.mp. (399)
- 6 alogliptin.mp. (310)
- 7 gemigliptin.mp. (24)
- 8 teneligliptin.mp. (51)
- 9 anagliptin.mp. (27)
- 10 omarigliptin.mp. (10)
- 11 or/1-10 (4081)
- 12 limit 11 to (clinical trial, phase iii or clinical trial, phase iv or clinical trial or randomized controlled trial) (614)

**II) Supplementary Embase Search Strategy:**

Database: Embase <1980 to 2016 Week 34> <August 19,2016>

Search Strategy:

- 1 Dipeptidyl-Peptidase 4 Inhibitors.mp. or exp Dipeptidyl-Peptidase IV Inhibitors/ (11779)
- 2 sitagliptin.mp. (5883)
- 3 saxagliptin.mp. (2104)
- 4 vildagliptin.mp. (2916)
- 5 linagliptin.mp. (1452)
- 6 alogliptin.mp. (1159)
- 7 gemigliptin.mp. (79)
- 8 teneligliptin.mp. (120)
- 9 anagliptin.mp. (97)
- 10 omarigliptin.mp. (36)
- 11 or/1-10 (11916)
- 12 limit 11 to (clinical trial or randomized controlled trial or phase 3 clinical trial or phase 4 clinical trial) (2104)
- 13 limit 12 to exclude medline journals (349)

**III) ClinicalTrials.gov Search Strategy: <August 22, 2016>**

"dipeptidyl peptidase 4 inhibitors" OR "alogliptin" OR "SYR-322" OR "linagliptin" OR "BI-1356" OR "saxagliptin" OR "BMS-477118" OR "sitagliptin" OR "MK-0431" OR "vildagliptin" OR "LAF237" OR "gemigliptin" OR "LC15-0444" OR "teneligliptin" OR "MP-513" OR "anagliptin" OR "CWP-0403" OR "omarigliptin" OR "MK-3102" OR "gosogliptin" OR "PF-00734200" | Interventional Studies | Completed | (528)

## SUPPLEMENTARY FIGURE LEGENDS

### Supplementary Figure 1: Funnel Plot

Funnel plot comparing the effect measure, relative risk (RR), for the heart failure outcome for the large RCTs with primary cardiovascular outcomes (SAVOR-TIMI 53, EXAMINE, and TECOS) and the 28 smaller RCTs with at least one patient with heart failure on the x-axis, with its precision, expressed as the standard error of the natural logarithm of RR,  $SE(\log[RR])$ , on the y-axis to assess for asymmetry. There was no statistical evidence of publication bias ( $P=0.44$  using the Egger regression test and  $P=0.59$  using the Begg and Mazumdar rank correlation test).

Abbreviations: RCTs, randomized controlled trials; RR, relative risk; SE, standard error.

### Supplementary Figure 2: Forest Plot for Heart Failure of Large Randomized Controlled Trials with Primary Cardiovascular Outcomes: Potential Impact of Ongoing Trials

Individual and pooled risk ratios (RR) with 95% confidence intervals (CI) for completed and ongoing randomized controlled trials (RCTs) with a primary outcome that included cardiovascular outcomes and reported the number of patients in each treatment group that were hospitalized for heart failure as an adjudicated primary or secondary outcome. For the ongoing trials, CARMELINA and MK-3102-018, baseline event rates were assumed similar to SAVOR-TIMI 53, EXAMINE, and TECOS (3.1%). Panel A shows that if the average RRs for the ongoing RCTs are identical, RRs of as little as 1.03 results in a statistically significant increased heart failure rate. Panel B shows that if the RRs for the ongoing RCTs are different, then for a RR of 0.90 for MK-3102-018, the RR for CARMELINA needs to be at least 1.18 to produce a significantly increased pooled heart failure rate for all five cardiovascular safety RCTs combined. The pooled RRs with 95% CI were calculated using random-effects models. Weight refers to the contribution of each study to the overall pooled estimate of treatment effect. Each square and

1  
2  
3  
4  
5  
6  
7  
8  
9  
10  
11  
12  
13  
14  
15  
16  
17  
18  
19  
20  
21  
22  
23  
24  
25  
26  
27  
28  
29  
30  
31  
32  
33  
34  
35  
36  
37  
38  
39  
40  
41  
42  
43  
44  
45  
46  
47  
48  
49  
50  
51  
52  
53  
54  
55  
56  
57  
58  
59  
60

horizontal line denotes the point estimate and 95% CI for each trial's RR. The diamonds signify the pooled RR; the diamond's centre denotes the point estimate and width denotes the 95% CI.

Confidential



FIGURE 1

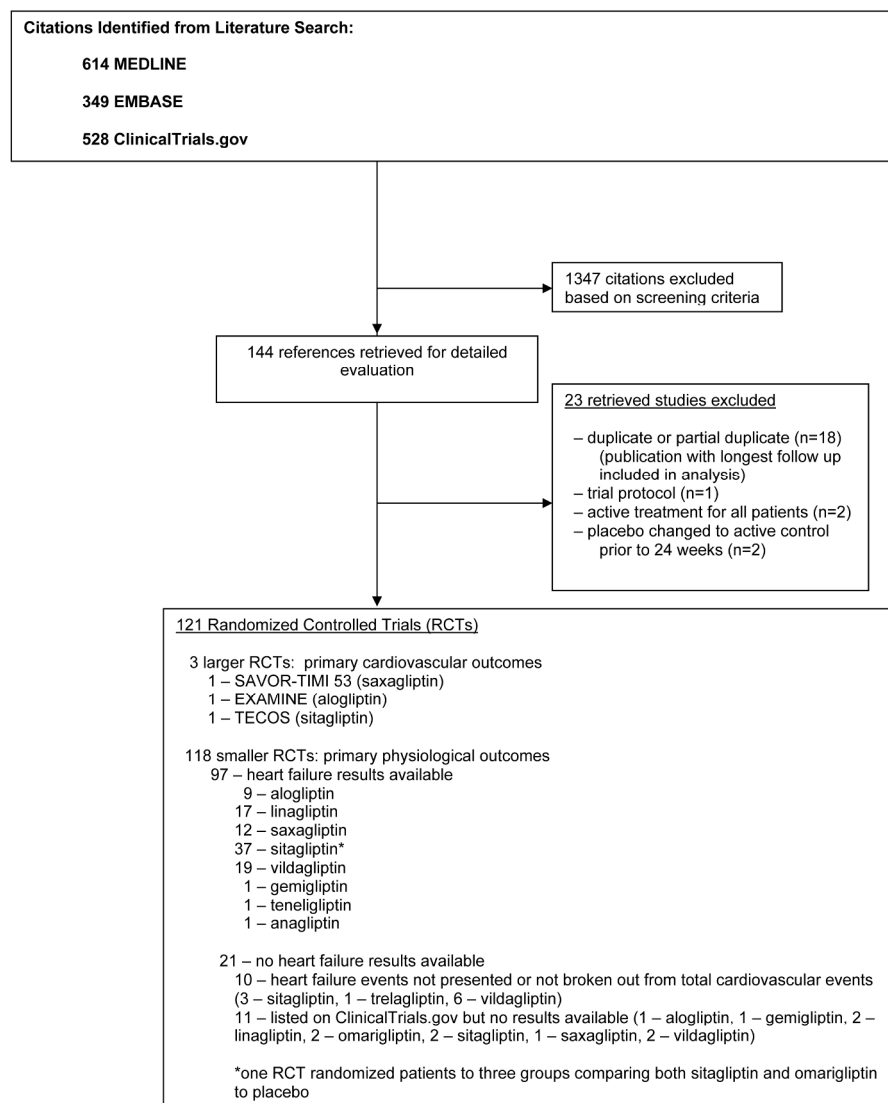

Figure 1: Search Strategy and Trial Flow  
Flow chart for the systematic review and meta-analysis showing the number of studies retained and number of studies excluded with reason for exclusion at each stage of the study selection process.

198x260mm (300 x 300 DPI)

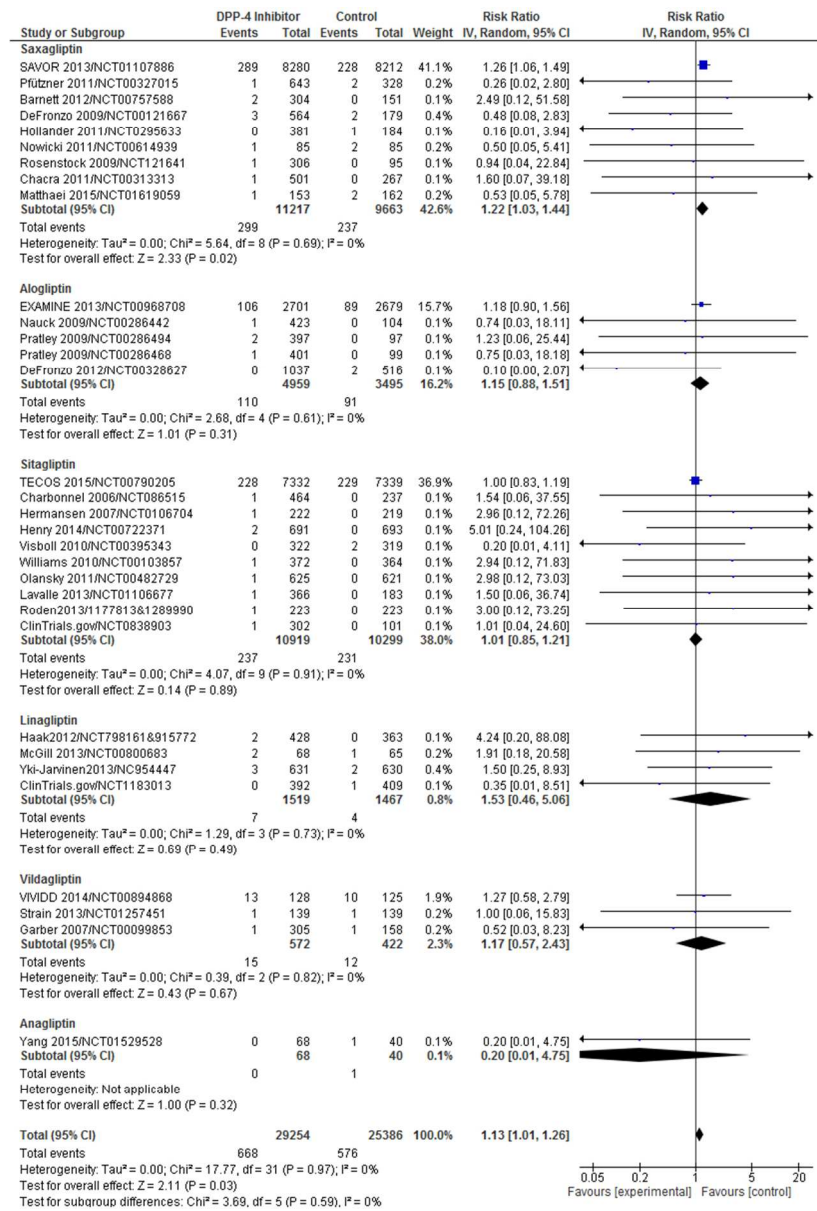

Figure 2: Forest Plot for Heart Failure: Large vs. Small Trials

Individual and pooled risk ratios (RR) with 95% confidence intervals (CI) for randomized controlled trials (RCTs) with a primary outcome that included cardiovascular outcomes and reported the number of patients in each treatment group that were hospitalized for HF as an adjudicated primary or secondary outcome, as well as smaller RCTs reporting at least one patient with HF for which outcomes were not necessarily adjudicated and patients not necessarily hospitalized. The pooled RRs with 95% CI were calculated using random-effects models. Weight refers to the contribution of each study to the overall pooled estimate of treatment effect. Each square and horizontal line denotes the point estimate and 95% CI for each trial's RR. The diamonds signify the pooled RR; the diamond's centre denotes the point estimate and width denotes the 95% CI.

288x424mm (72 x 72 DPI)

Confidential

1  
2  
3  
4  
5  
6  
7  
8  
9  
10  
11  
12  
13  
14  
15  
16  
17  
18  
19  
20  
21  
22  
23  
24  
25  
26  
27  
28  
29  
30  
31  
32  
33  
34  
35  
36  
37  
38  
39  
40  
41  
42  
43  
44  
45  
46  
47  
48  
49  
50  
51  
52  
53  
54  
55  
56  
57  
58  
59  
60

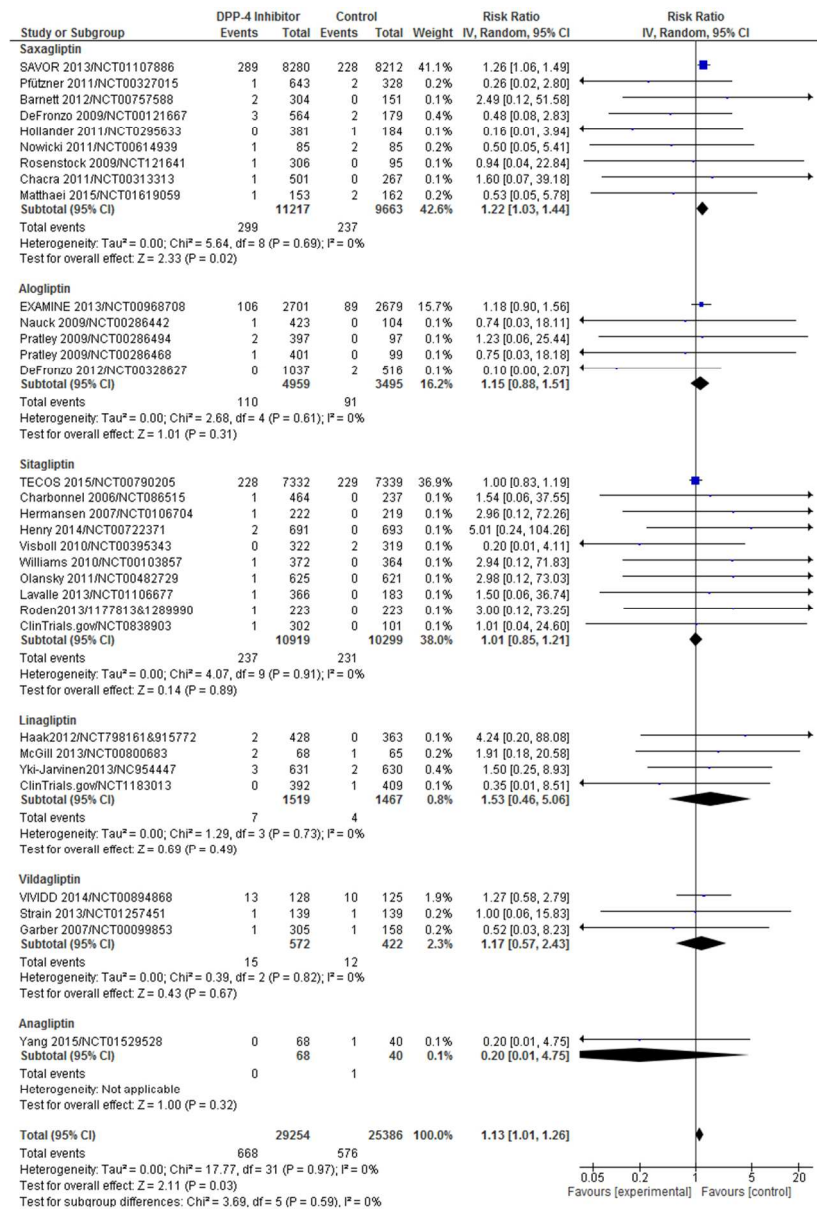

Figure 3: Forest Plot for Heart Failure by DPP-4 Inhibitor

Individual and pooled risk ratios (RR) with 95% confidence intervals (CI) for larger and smaller randomized controlled trials (RCTs) by DPP-4 inhibitor. Interaction p-values comparing RRs between pairs of subgroups of RCTs using different DPP-4 inhibitors were all non-significant. For the most extreme difference between saxagliptin RCTs and sitagliptin RCTs, interaction P=0.13 (interaction P=0.07 comparing RR for only SAVOR-TIMI 53 vs. TECOS). The pooled RRs with 95% CI were calculated using random-effects models. Interaction p-values were calculated using Z tests. Weight refers to the contribution of each study to the overall pooled estimate of treatment effect. Each square and horizontal line denotes the point estimate and 95% CI for each trial's RR. The diamonds signify the pooled RR; the diamond's centre denotes the point estimate and width denotes the 95% CI.

288x424mm (72 x 72 DPI)

Confidential

1  
2  
3  
4  
5  
6  
7  
8  
9  
10  
11  
12  
13  
14  
15  
16  
17  
18  
19  
20  
21  
22  
23  
24  
25  
26  
27  
28  
29  
30  
31  
32  
33  
34  
35  
36  
37  
38  
39  
40  
41  
42  
43  
44  
45  
46  
47  
48  
49  
50  
51  
52  
53  
54  
55  
56  
57  
58  
59  
60

1  
2  
3  
4  
5  
6  
7  
8  
9  
10  
11  
12  
13  
14  
15  
16  
17  
18  
19  
20  
21  
22  
23  
24  
25  
26  
27  
28  
29  
30  
31  
32  
33  
34  
35  
36  
37  
38  
39  
40  
41  
42  
43  
44  
45  
46  
47  
48  
49  
50  
51  
52  
53  
54  
55  
56  
57  
58  
59  
60

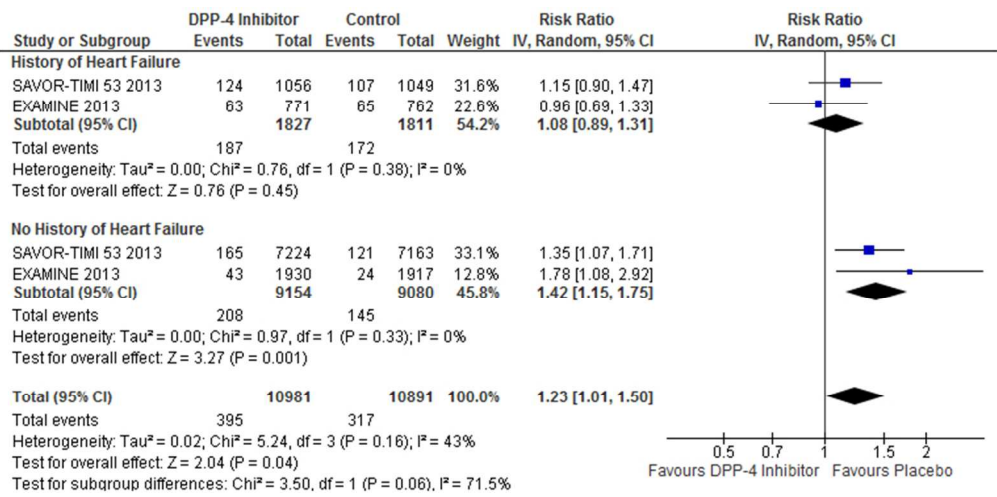

Figure 4: Forest Plot for Heart Failure Requiring Hospitalization by Previous History of Heart Failure Individual and pooled risk ratios (RR) with 95% confidence intervals (CI) for the outcome of heart failure requiring hospitalization in subgroups of patients with vs without previous heart failure in SAVOR TIMI-53 and EXAMINE, the only RCTs that provided this data. Average rates of HF requiring hospitalization were 9.9%  $([124+107+63+65]/[1056+1049+771+762]=359/3638)$  in patients with vs 1.9%  $([165+121+43+24]/[7224+7163+1930+1917]=353/18234)$  in patients without a prior history of HF. In this analysis, the heterogeneity in the overall analysis ( $I^2=43\%$ ) is reduced ( $I^2=0\%$ ) within each subgroup. The pooled RRs with 95% CI were calculated using random-effects models. Interaction p-values were calculated using Z tests. Weight refers to the contribution of each study to the overall pooled estimate of treatment effect. Each square and horizontal line denotes the point estimate and 95% CI for each trial's RR. The diamonds signify the pooled RR; the diamond's centre denotes the point estimate and width denotes the 95% CI.

268x130mm (72 x 72 DPI)

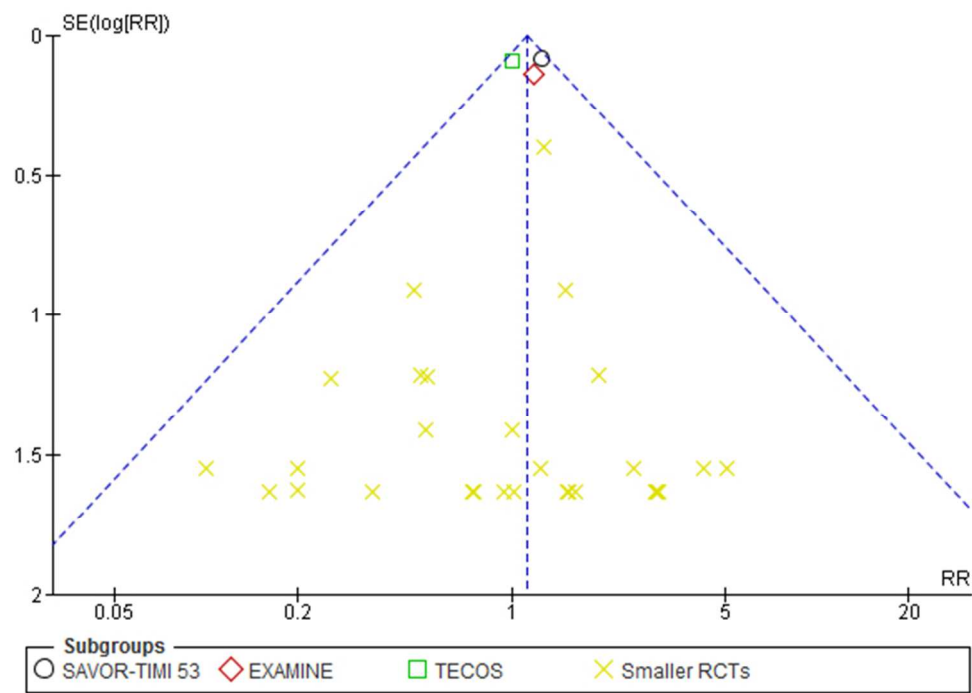

212x151mm (72 x 72 DPI)

1  
2  
3  
4  
5  
6  
7  
8  
9  
10  
11  
12  
13  
14  
15  
16  
17  
18  
19  
20  
21  
22  
23  
24  
25  
26  
27  
28  
29  
30  
31  
32  
33  
34  
35  
36  
37  
38  
39  
40  
41  
42  
43  
44  
45  
46  
47  
48  
49  
50  
51  
52  
53  
54  
55  
56  
57  
58  
59  
60

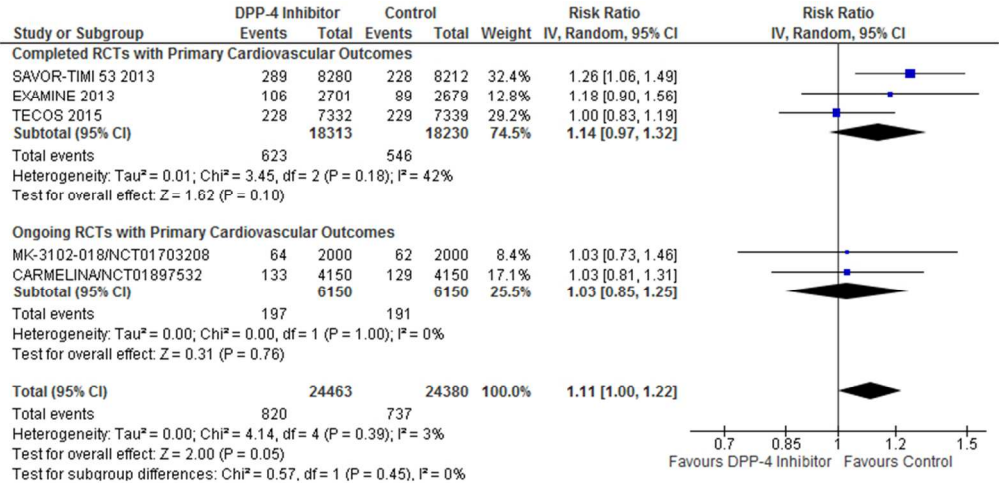

282x136mm (72 x 72 DPI)



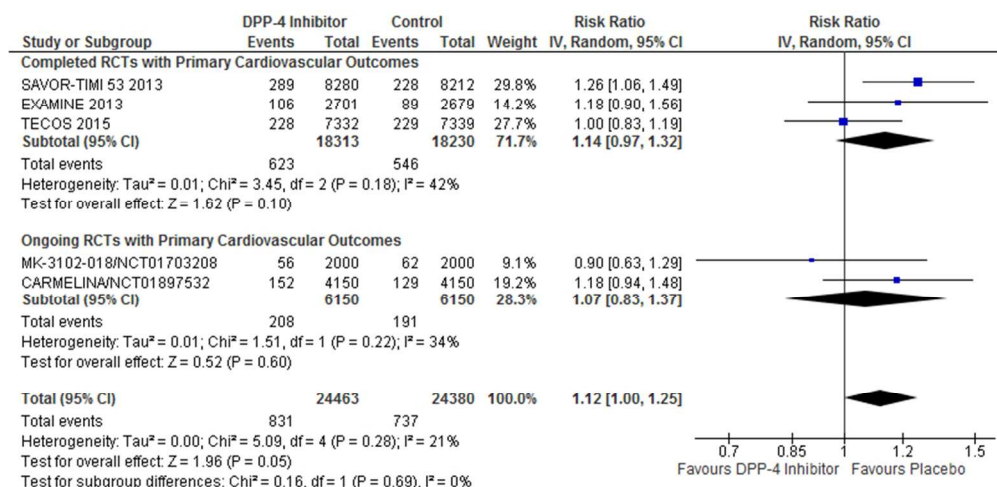

284x136mm (72 x 72 DPI)

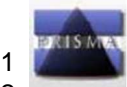

# PRISMA 2009 Checklist

1  
2  
3  
4  
5  
6  
7  
8  
9  
10  
11  
12  
13  
14  
15  
16  
17  
18  
19  
20  
21  
22  
23  
24  
25  
26  
27  
28  
29  
30  
31  
32  
33  
34  
35  
36  
37  
38  
39  
40  
41  
42  
43  
44  
45  
46  
47  
48  
49

| Section/topic                      | #  | Checklist item                                                                                                                                                                                                                                                                                              | Reported on page #     |
|------------------------------------|----|-------------------------------------------------------------------------------------------------------------------------------------------------------------------------------------------------------------------------------------------------------------------------------------------------------------|------------------------|
| <b>TITLE</b>                       |    |                                                                                                                                                                                                                                                                                                             |                        |
| Title                              | 1  | Identify the report as a systematic review, meta-analysis, or both.                                                                                                                                                                                                                                         | 1                      |
| <b>ABSTRACT</b>                    |    |                                                                                                                                                                                                                                                                                                             |                        |
| Structured summary                 | 2  | Provide a structured summary including, as applicable: background; objectives; data sources; study eligibility criteria, participants, and interventions; study appraisal and synthesis methods; results; limitations; conclusions and implications of key findings; systematic review registration number. | 3                      |
| <b>INTRODUCTION</b>                |    |                                                                                                                                                                                                                                                                                                             |                        |
| Rationale                          | 3  | Describe the rationale for the review in the context of what is already known.                                                                                                                                                                                                                              | 5                      |
| Objectives                         | 4  | Provide an explicit statement of questions being addressed with reference to participants, interventions, comparisons, outcomes, and study design (PICOS).                                                                                                                                                  | 6                      |
| <b>METHODS</b>                     |    |                                                                                                                                                                                                                                                                                                             |                        |
| Protocol and registration          | 5  | Indicate if a review protocol exists, if and where it can be accessed (e.g., Web address), and, if available, provide registration information including registration number.                                                                                                                               | 7                      |
| Eligibility criteria               | 6  | Specify study characteristics (e.g., PICOS, length of follow-up) and report characteristics (e.g., years considered, language, publication status) used as criteria for eligibility, giving rationale.                                                                                                      | 7                      |
| Information sources                | 7  | Describe all information sources (e.g., databases with dates of coverage, contact with study authors to identify additional studies) in the search and date last searched.                                                                                                                                  | 7, Fig 1, Supp Table 1 |
| Search                             | 8  | Present full electronic search strategy for at least one database, including any limits used, such that it could be repeated.                                                                                                                                                                               | Figure 1, Supp Table 1 |
| Study selection                    | 9  | State the process for selecting studies (i.e., screening, eligibility, included in systematic review, and, if applicable, included in the meta-analysis).                                                                                                                                                   | 7                      |
| Data collection process            | 10 | Describe method of data extraction from reports (e.g., piloted forms, independently, in duplicate) and any processes for obtaining and confirming data from investigators.                                                                                                                                  | 7                      |
| Data items                         | 11 | List and define all variables for which data were sought (e.g., PICOS, funding sources) and any assumptions and simplifications made.                                                                                                                                                                       | 7                      |
| Risk of bias in individual studies | 12 | Describe methods used for assessing risk of bias of individual studies (including specification of whether this was done at the study or outcome level), and how this information is to be used in any data synthesis.                                                                                      | 7                      |
| Summary measures                   | 13 | State the principal summary measures (e.g., risk ratio, difference in means).                                                                                                                                                                                                                               | Supp                   |

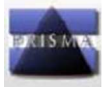

# PRISMA 2009 Checklist

|                      |    |                                                                                                                                                           |           |
|----------------------|----|-----------------------------------------------------------------------------------------------------------------------------------------------------------|-----------|
|                      |    |                                                                                                                                                           | p.55      |
| Synthesis of results | 14 | Describe the methods of handling data and combining results of studies, if done, including measures of consistency (e.g., $I^2$ ) for each meta-analysis. | Supp p.55 |

Page 1 of 2

| Section/topic                 | #  | Checklist item                                                                                                                                                                                           | Reported on page #     |
|-------------------------------|----|----------------------------------------------------------------------------------------------------------------------------------------------------------------------------------------------------------|------------------------|
| Risk of bias across studies   | 15 | Specify any assessment of risk of bias that may affect the cumulative evidence (e.g., publication bias, selective reporting within studies).                                                             | Supp p.55              |
| Additional analyses           | 16 | Describe methods of additional analyses (e.g., sensitivity or subgroup analyses, meta-regression), if done, indicating which were pre-specified.                                                         | Supp p. 55             |
| <b>RESULTS</b>                |    |                                                                                                                                                                                                          |                        |
| Study selection               | 17 | Give numbers of studies screened, assessed for eligibility, and included in the review, with reasons for exclusions at each stage, ideally with a flow diagram.                                          | Figure 1, Supp Table 1 |
| Study characteristics         | 18 | For each study, present characteristics for which data were extracted (e.g., study size, PICOS, follow-up period) and provide the citations.                                                             | 8-9 Tables 1-2         |
| Risk of bias within studies   | 19 | Present data on risk of bias of each study and, if available, any outcome level assessment (see item 12).                                                                                                | 9, Table 3             |
| Results of individual studies | 20 | For all outcomes considered (benefits or harms), present, for each study: (a) simple summary data for each intervention group (b) effect estimates and confidence intervals, ideally with a forest plot. | 9-11, Figs 2-3         |
| Synthesis of results          | 21 | Present results of each meta-analysis done, including confidence intervals and measures of consistency.                                                                                                  | 9-11, Figs 2-3         |
| Risk of bias across studies   | 22 | Present results of any assessment of risk of bias across studies (see Item 15).                                                                                                                          | Supp p.56, Supp Fig 1  |
| Additional analysis           | 23 | Give results of additional analyses, if done (e.g., sensitivity or subgroup analyses, meta-regression [see Item 16]).                                                                                    | 10-11, Figs 2-4        |
| <b>DISCUSSION</b>             |    |                                                                                                                                                                                                          |                        |

For Peer Review Only

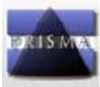

# PRISMA 2009 Checklist

|                     |    |                                                                                                                                                                                      |       |
|---------------------|----|--------------------------------------------------------------------------------------------------------------------------------------------------------------------------------------|-------|
| Summary of evidence | 24 | Summarize the main findings including the strength of evidence for each main outcome; consider their relevance to key groups (e.g., healthcare providers, users, and policy makers). | 12    |
| Limitations         | 25 | Discuss limitations at study and outcome level (e.g., risk of bias), and at review-level (e.g., incomplete retrieval of identified research, reporting bias).                        | 13-14 |
| Conclusions         | 26 | Provide a general interpretation of the results in the context of other evidence, and implications for future research.                                                              | 13-14 |
| FUNDING             |    |                                                                                                                                                                                      |       |
| Funding             | 27 | Describe sources of funding for the systematic review and other support (e.g., supply of data); role of funders for the systematic review.                                           | 15    |

From: Moher D, Liberati A, Tetzlaff J, Altman DG, The PRISMA Group (2009). Preferred Reporting Items for Systematic Reviews and Meta-Analyses: The PRISMA Statement. PLoS Med 6(6): e1000097. doi:10.1371/journal.pmed1000097

For more information, visit: [www.prisma-statement.org](http://www.prisma-statement.org).
